# Supplementary material for: Theoretical study on the mechanism of hot excitons combined with aggregation-induced emission in efficient red fluorescent molecules
Source: Royal Society of Chemistry journal article supplement (doi:10.1039/d2cp02552c), 2022-01-01
Supplement: d2cp02552c1.pdf [file d2cp02552c1.pdf]

Supporting Information

*PCCP*

## **Theoretical study on the mechanism of hot exciton combined with aggregation induced emission in efficient red fluorescent molecules**

*Jiao Wang,<sup>a</sup> Xinnan Jiang,<sup>a</sup> Tingdong Liang,<sup>a</sup> Yuyu Pan,<sup>\*a</sup> Bing Yang<sup>b</sup>*

<sup>a</sup>School of Petrochemical Engineering, Shenyang University of Technology, 30 Guanghua Street, Liaoyang, 111003, P. R. China;

<sup>b</sup>State Key Laboratory of Supramolecular Structure and Materials, Jilin University, Changchun, 130012, P. R. China.

Tel: +86 15140996671;

E-mail: panyu0422@sut.edu.cn

### **Contents**

**S1:** Potential surface scanning of PBTPA in toluene.

**S2:** The Huang-Rhys (HR) factor factors versus the normal mode frequencies in the solvents and aggregation states.

**S3:** The transition properties of dimer-4.

**S4:** Cartesian coordinates of optimized geometries.

**S1:** Potential surface scanning of PBTPA in toluene.

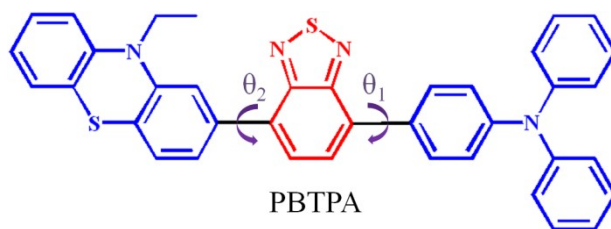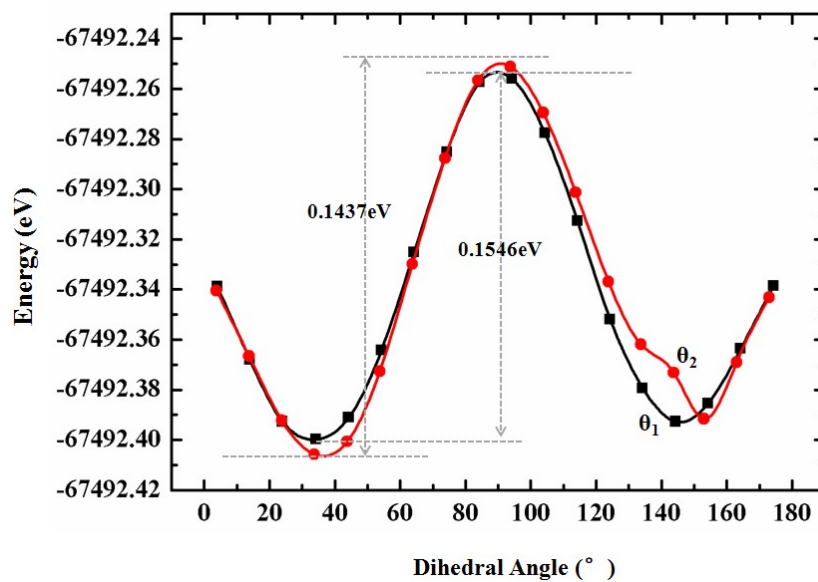

**S2:** The Huang-Rhys (HR) factor factors versus the normal mode frequencies in vacuum (a), solvents ((b): Toluene, (c): Tetrahydrofuran, (d): Acetonitrile) and (e):Aggregation state.

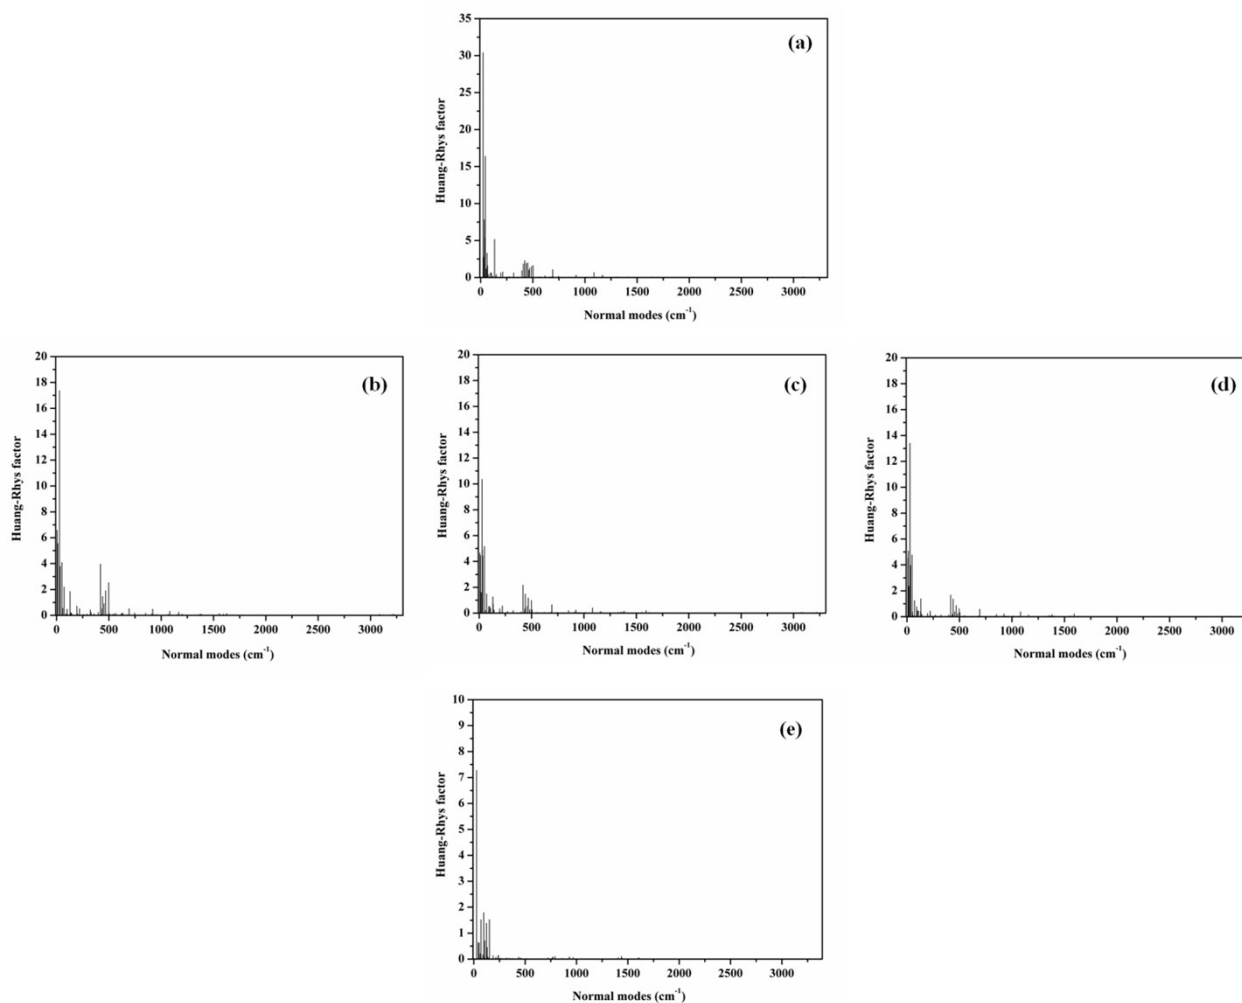

**S3:** The transition properties of dimer-4

The transition properties of dimer-4 (with the strongest interaction energy) are analyzed (see Figure S4). As shown in the figure we divide the molecule into 6 parts for calculating the charge transfer ratio, and the calculation results. It is found that the charge transfer during transition only occurs in one molecule, which indicates that dimers are not responsible for emission.

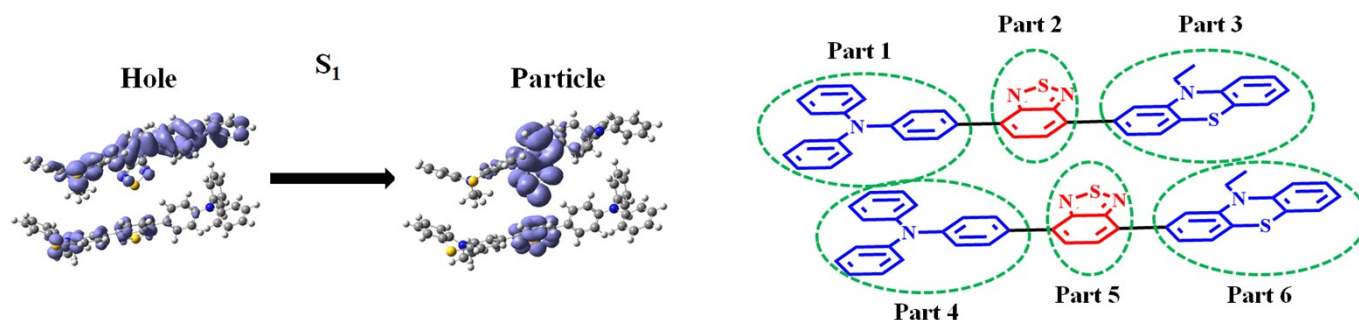

#### S4: Cartesian coordinates of optimized geometries.

The cartesian coordinates of optimized ground state ( $S_0$ ) geometry in vacuum

| No. | Symbols | X           | Y           | Z           |
|-----|---------|-------------|-------------|-------------|
| 1   | N       | -6.69084000 | -0.14758800 | -0.19250500 |
| 2   | C       | -5.28286100 | -0.20813000 | -0.06518300 |
| 3   | C       | -4.66086100 | -1.31622500 | 0.53597500  |
| 4   | C       | -4.46938900 | 0.84040100  | -0.52761700 |
| 5   | C       | -3.27873700 | -1.37101700 | 0.65371700  |
| 6   | C       | -3.08827900 | 0.78491700  | -0.39048200 |
| 7   | C       | -2.45350100 | -0.32730100 | 0.19336100  |
| 8   | C       | -7.43421500 | -1.32509300 | -0.48722600 |
| 9   | C       | -8.62976600 | -1.60043000 | 0.19486400  |
| 10  | C       | -9.36161200 | -2.74717000 | -0.10675400 |
| 11  | C       | -8.90852300 | -3.64456100 | -1.07566800 |
| 12  | C       | -7.71545100 | -3.37691800 | -1.74988500 |
| 13  | C       | -6.98594100 | -2.22373700 | -1.46831400 |
| 14  | C       | -7.37511100 | 1.08910700  | -0.02104400 |
| 15  | C       | -7.02931500 | 1.95619900  | 1.02746400  |
| 16  | C       | -7.69958700 | 3.16727500  | 1.18638400  |
| 17  | C       | -8.73456400 | 3.52520900  | 0.32019400  |
| 18  | C       | -9.08753800 | 2.65928100  | -0.71661900 |
| 19  | C       | -8.41066000 | 1.45448600  | -0.89524700 |
| 20  | H       | -5.26904400 | -2.12586800 | 0.92419100  |
| 21  | H       | -2.83209600 | -2.22416500 | 1.15517100  |
| 22  | H       | -4.92747600 | 1.70128000  | -1.00204000 |
| 23  | H       | -2.49000800 | 1.60921700  | -0.75781500 |
| 24  | H       | -8.97850800 | -0.91199500 | 0.95728600  |
| 25  | H       | 10.28475400 | -2.94565500 | 0.43020700  |
| 26  | H       | -9.47809800 | -4.54036000 | -1.30287300 |
| 27  | H       | -7.35511000 | -4.06170300 | -2.51223600 |
| 28  | H       | -6.06752500 | -2.01143600 | -2.00529500 |
| 29  | H       | -6.23538600 | 1.67596400  | 1.71151300  |
| 30  | H       | -7.41913100 | 3.82714600  | 2.00232500  |
| 31  | H       | -9.25937500 | 4.46636800  | 0.45163800  |
| 32  | H       | -9.88647500 | 2.92725100  | -1.40204700 |
| 33  | H       | -8.67889700 | 0.79020900  | -1.70985400 |
| 34  | C       | -0.98496700 | -0.43596000 | 0.30304100  |
| 35  | C       | -0.33412800 | -1.65231500 | 0.20701200  |
| 36  | C       | -0.12410000 | 0.69794200  | 0.52522000  |
| 37  | C       | 1.07239700  | -1.80503100 | 0.32342300  |
| 38  | C       | 1.32357300  | 0.54135100  | 0.64006800  |
| 39  | C       | 1.94366600  | -0.75463000 | 0.54152200  |
| 40  | N       | -0.53008400 | 1.96432700  | 0.67265800  |
| 41  | N       | 1.96119100  | 1.69690300  | 0.86592800  |
| 42  | S       | 0.81406300  | 2.87139800  | 0.92680300  |
| 43  | H       | 1.48129500  | -2.80262400 | 0.19883700  |

|    |   |             |             |             |
|----|---|-------------|-------------|-------------|
| 44 | H | -0.91942100 | -2.54182900 | -0.00270600 |
| 45 | C | 3.40184800  | -0.96974700 | 0.67412000  |
| 46 | C | 4.32312200  | -0.03357400 | 0.17489200  |
| 47 | C | 3.89045700  | -2.14092000 | 1.27000900  |
| 48 | C | 5.70964100  | -0.21686200 | 0.27844800  |
| 49 | H | 3.93061800  | 0.85554000  | -0.29056600 |
| 50 | C | 5.26232400  | -2.34714600 | 1.36972000  |
| 51 | H | 3.20610900  | -2.87148400 | 1.68731300  |
| 52 | C | 6.16867600  | -1.39361000 | 0.90741000  |
| 53 | H | 5.64350800  | -3.24501700 | 1.84688900  |
| 54 | C | 7.91885200  | 0.40880800  | -0.63335600 |
| 55 | C | 8.59129400  | -0.71015800 | -0.09587600 |
| 56 | C | 8.61058300  | 1.17337900  | -1.59048700 |
| 57 | C | 9.86455000  | -1.06659300 | -0.53912000 |
| 58 | H | 8.14730200  | 2.04611700  | -2.02932400 |
| 59 | C | 9.90237700  | 0.83633400  | -1.99683000 |
| 60 | C | 10.53519500 | -0.29178200 | -1.48530800 |
| 61 | H | 10.33798100 | -1.94717100 | -0.11499600 |
| 62 | H | 10.40198200 | 1.46109800  | -2.73110900 |
| 63 | H | 11.53337300 | -0.56747800 | -1.80942000 |
| 64 | N | 6.61601200  | 0.75442400  | -0.20705400 |
| 65 | S | 7.89240200  | -1.61431100 | 1.26740300  |
| 66 | C | 6.10339900  | 2.09332400  | -0.52564700 |
| 67 | H | 5.36463700  | 2.34536400  | 0.24029700  |
| 68 | H | 6.93338700  | 2.79353300  | -0.39307400 |
| 69 | C | 5.48359200  | 2.28004000  | -1.92137000 |
| 70 | H | 5.15777400  | 3.31921000  | -2.03746400 |
| 71 | H | 6.19308400  | 2.05673300  | -2.72108200 |
| 72 | H | 4.61424700  | 1.63704600  | -2.07310600 |

The cartesian coordinates of optimized the first singlet excited state ( $S_1$ ) geometry in vacuum

| No. | Symbols | X        | Y         | Z         |
|-----|---------|----------|-----------|-----------|
| 1   | N       | 6.678683 | -0.078423 | 0.067804  |
| 2   | C       | 5.27562  | -0.179709 | 0.045335  |
| 3   | C       | 4.646882 | -1.324823 | -0.470938 |
| 4   | C       | 4.470772 | 0.865198  | 0.524873  |
| 5   | C       | 3.269257 | -1.414776 | -0.49291  |
| 6   | C       | 3.091656 | 0.776485  | 0.483188  |
| 7   | C       | 2.441268 | -0.37273  | -0.017925 |
| 8   | C       | 7.474847 | -1.228426 | 0.289424  |
| 9   | C       | 8.649052 | -1.426782 | -0.44616  |
| 10  | C       | 9.432545 | -2.551321 | -0.217056 |
| 11  | C       | 9.05274  | -3.498045 | 0.731693  |
| 12  | C       | 7.880443 | -3.303825 | 1.458818  |
| 13  | C       | 7.097655 | -2.174937 | 1.24942   |
| 14  | C       | 7.308484 | 1.171794  | -0.152356 |

|    |   |            |           |           |
|----|---|------------|-----------|-----------|
| 15 | C | 6.818338   | 2.048481  | -1.12722  |
| 16 | C | 7.438636   | 3.274347  | -1.334909 |
| 17 | C | 8.560288   | 3.635825  | -0.592038 |
| 18 | C | 9.053416   | 2.758764  | 0.371287  |
| 19 | C | 8.430942   | 1.537468  | 0.599365  |
| 20 | H | 5.252711   | -2.130079 | -0.873199 |
| 21 | H | 2.818066   | -2.292426 | -0.943018 |
| 22 | H | 4.942306   | 1.750842  | 0.938081  |
| 23 | H | 2.494375   | 1.596715  | 0.857181  |
| 24 | H | 8.937577   | -0.694005 | -1.192657 |
| 25 | H | 10.340244  | -2.693506 | -0.794785 |
| 26 | H | 9.664164   | -4.377396 | 0.903111  |
| 27 | H | 7.577149   | -4.029534 | 2.206671  |
| 28 | H | 6.190671   | -2.014817 | 1.823196  |
| 29 | H | 5.950506   | 1.761247  | -1.71176  |
| 30 | H | 7.047625   | 3.945614  | -2.092668 |
| 31 | H | 9.044706   | 4.591362  | -0.761679 |
| 32 | H | 9.922603   | 3.030949  | 0.96149   |
| 33 | H | 8.806169   | 0.857892  | 1.357617  |
| 34 | C | 0.990465   | -0.511445 | -0.045393 |
| 35 | C | 0.392392   | -1.788817 | -0.056649 |
| 36 | C | 0.095187   | 0.608272  | -0.062498 |
| 37 | C | -0.974161  | -1.979574 | -0.120609 |
| 38 | C | -1.348538  | 0.41266   | -0.132007 |
| 39 | C | -1.900963  | -0.911485 | -0.184638 |
| 40 | N | 0.459404   | 1.889806  | -0.051349 |
| 41 | N | -2.030156  | 1.560996  | -0.164529 |
| 42 | S | -0.922058  | 2.79758   | -0.111857 |
| 43 | H | -1.338416  | -2.998233 | -0.069245 |
| 44 | H | 1.026171   | -2.663038 | 0.040181  |
| 45 | C | -3.325397  | -1.177578 | -0.298382 |
| 46 | C | -4.27777   | -0.16416  | -0.11532  |
| 47 | C | -3.815636  | -2.480207 | -0.597849 |
| 48 | C | -5.649643  | -0.381743 | -0.228552 |
| 49 | H | -3.901822  | 0.815847  | 0.119153  |
| 50 | C | -5.166709  | -2.721369 | -0.688909 |
| 51 | H | -3.132326  | -3.297971 | -0.785253 |
| 52 | C | -6.102158  | -1.693483 | -0.506631 |
| 53 | H | -5.526415  | -3.720204 | -0.917004 |
| 54 | C | -7.898502  | 0.533304  | 0.17587   |
| 55 | C | -8.570627  | -0.688763 | -0.048245 |
| 56 | C | -8.668231  | 1.605351  | 0.670427  |
| 57 | C | -9.936793  | -0.817016 | 0.214611  |
| 58 | H | -8.199922  | 2.556506  | 0.881067  |
| 59 | C | -10.025068 | 1.468652  | 0.914723  |
| 60 | C | -10.672724 | 0.254575  | 0.690416  |
| 61 | H | -10.413736 | -1.775728 | 0.034338  |

|    |   |            |           |           |
|----|---|------------|-----------|-----------|
| 62 | H | -10.578096 | 2.320303  | 1.295602  |
| 63 | H | -11.73235  | 0.144573  | 0.889066  |
| 64 | N | -6.53987   | 0.691103  | -0.094048 |
| 65 | S | -7.777735  | -2.079619 | -0.755837 |
| 66 | C | -5.981247  | 2.050602  | -0.102568 |
| 67 | H | -5.140251  | 2.052056  | -0.798203 |
| 68 | H | -6.741428  | 2.706594  | -0.531348 |
| 69 | C | -5.531878  | 2.551226  | 1.27031   |
| 70 | H | -5.193272  | 3.586658  | 1.186571  |
| 71 | H | -6.344265  | 2.508706  | 1.999649  |
| 72 | H | -4.701516  | 1.957381  | 1.6558    |

The cartesian coordinates of optimized the first triplet excited state ( $T_1$ ) geometry in vacuum

| No. | Symbols | X           | Y           | Z           |
|-----|---------|-------------|-------------|-------------|
| 1   | N       | 6.67653500  | -0.10414400 | 0.04000100  |
| 2   | C       | 5.28268800  | -0.18013800 | 0.07827000  |
| 3   | C       | 4.61218200  | -1.37998600 | -0.23361500 |
| 4   | C       | 4.50508400  | 0.94338800  | 0.42186300  |
| 5   | C       | 3.23824500  | -1.44528400 | -0.19714700 |
| 6   | C       | 3.12978100  | 0.87928900  | 0.44389000  |
| 7   | C       | 2.43018400  | -0.32181800 | 0.13733300  |
| 8   | C       | 7.47617700  | -1.25222500 | 0.28821900  |
| 9   | C       | 8.57621000  | -1.52728800 | -0.52934000 |
| 10  | C       | 9.36970200  | -2.63965800 | -0.27431300 |
| 11  | C       | 9.06940200  | -3.49385400 | 0.78412500  |
| 12  | C       | 7.97045400  | -3.22066900 | 1.59535000  |
| 13  | C       | 7.18044400  | -2.10142100 | 1.35898100  |
| 14  | C       | 7.32722200  | 1.11850000  | -0.28227500 |
| 15  | C       | 6.86479000  | 1.90710500  | -1.34002200 |
| 16  | C       | 7.51049200  | 3.09828800  | -1.65063400 |
| 17  | C       | 8.62991400  | 3.50392100  | -0.92784700 |
| 18  | C       | 9.09674400  | 2.71010400  | 0.11726200  |
| 19  | C       | 8.44771500  | 1.52586200  | 0.44697100  |
| 20  | H       | 5.18710800  | -2.25120500 | -0.52754000 |
| 21  | H       | 2.77272200  | -2.37670000 | -0.49552600 |
| 22  | H       | 5.00210900  | 1.87045300  | 0.68604000  |
| 23  | H       | 2.56515600  | 1.75731900  | 0.72284900  |
| 24  | H       | 8.80096400  | -0.86295400 | -1.35750400 |
| 25  | H       | 10.22146800 | -2.84470700 | -0.91462900 |
| 26  | H       | 9.68774700  | -4.36390000 | 0.97676600  |
| 27  | H       | 7.73272900  | -3.87404100 | 2.42852300  |
| 28  | H       | 6.33171000  | -1.87578900 | 1.99679100  |
| 29  | H       | 5.99959700  | 1.58077800  | -1.90817800 |
| 30  | H       | 7.14261700  | 3.70495100  | -2.47164600 |
| 31  | H       | 9.13506900  | 4.43064400  | -1.17771500 |
| 32  | H       | 9.96579100  | 3.01862400  | 0.68916900  |

|    |   |              |             |             |
|----|---|--------------|-------------|-------------|
| 33 | H | 8.80169600   | 0.90716700  | 1.26538800  |
| 34 | C | 1.00321500   | -0.42294300 | 0.14721900  |
| 35 | C | 0.35554500   | -1.74606700 | 0.15052000  |
| 36 | C | 0.09772300   | 0.69666100  | 0.16501500  |
| 37 | C | -0.97132500  | -1.92214600 | 0.06608600  |
| 38 | C | -1.35501800  | 0.50410100  | 0.06861400  |
| 39 | C | -1.92904900  | -0.80923400 | -0.05124000 |
| 40 | N | 0.45554800   | 1.96694900  | 0.21595500  |
| 41 | N | -2.03028000  | 1.64386800  | 0.05717900  |
| 42 | S | -0.93485300  | 2.90405700  | 0.16924000  |
| 43 | H | -1.36283900  | -2.92727500 | 0.15194100  |
| 44 | H | 0.97956400   | -2.61808900 | 0.30079600  |
| 45 | C | -3.32635200  | -1.08286100 | -0.26570000 |
| 46 | C | -4.31407700  | -0.08156800 | -0.11012900 |
| 47 | C | -3.76311700  | -2.37578700 | -0.64265500 |
| 48 | C | -5.66426500  | -0.31504700 | -0.33935600 |
| 49 | H | -3.98016800  | 0.89570500  | 0.18791300  |
| 50 | C | -5.10413100  | -2.62198000 | -0.86448100 |
| 51 | H | -3.05715100  | -3.17921300 | -0.80632000 |
| 52 | C | -6.05769300  | -1.61133100 | -0.73559700 |
| 53 | H | -5.43183700  | -3.61109300 | -1.16889300 |
| 54 | C | -7.94815300  | 0.46596300  | 0.11382300  |
| 55 | C | -8.55818000  | -0.75649600 | -0.22277600 |
| 56 | C | -8.74163700  | 1.41935600  | 0.76936000  |
| 57 | C | -9.87727100  | -1.02316800 | 0.12618700  |
| 58 | H | -8.32653100  | 2.38001200  | 1.04227100  |
| 59 | C | -10.07340300 | 1.16064400  | 1.08035700  |
| 60 | C | -10.64937400 | -0.06431500 | 0.77402900  |
| 61 | H | -10.30130300 | -1.98772500 | -0.13616600 |
| 62 | H | -10.65366900 | 1.92936800  | 1.57984900  |
| 63 | H | -11.68200700 | -0.27457600 | 1.02806900  |
| 64 | N | -6.60708700  | 0.72352600  | -0.22133100 |
| 65 | S | -7.71101500  | -1.94380400 | -1.22520700 |
| 66 | C | -6.10886700  | 2.09174400  | -0.08250200 |
| 67 | H | -5.26315700  | 2.20082500  | -0.76697500 |
| 68 | H | -6.89470600  | 2.75446600  | -0.45442200 |
| 69 | C | -5.69111200  | 2.50283200  | 1.33350800  |
| 70 | H | -5.45733000  | 3.57077200  | 1.34998600  |
| 71 | H | -6.48536700  | 2.31304000  | 2.05834000  |
| 72 | H | -4.80445400  | 1.96285600  | 1.66954000  |

The cartesian coordinates of optimized the second triplet excited state ( $T_2$ ) geometry in vacuum

| No. | Symbols | X          | Y           | Z           |
|-----|---------|------------|-------------|-------------|
| 1   | N       | 6.73960100 | -0.09788400 | 0.07517200  |
| 2   | C       | 5.32823700 | -0.17850900 | 0.00696500  |
| 3   | C       | 4.69652000 | -1.32472900 | -0.51882500 |
| 4   | C       | 4.51792100 | 0.88479300  | 0.45305100  |



|    |   |             |             |             |
|----|---|-------------|-------------|-------------|
| 5  | C | 3.31086200  | -1.40108000 | -0.57953700 |
| 6  | C | 3.13095600  | 0.80830600  | 0.37910700  |
| 7  | C | 2.47548700  | -0.34394800 | -0.12817600 |
| 8  | C | 7.49041000  | -1.23289700 | 0.46275900  |
| 9  | C | 8.71633000  | -1.53272900 | -0.16356700 |
| 10 | C | 9.45034200  | -2.65451800 | 0.22880100  |
| 11 | C | 8.97416300  | -3.50391200 | 1.23531900  |
| 12 | C | 7.75177400  | -3.21168300 | 1.85308700  |
| 13 | C | 7.01627600  | -2.08471200 | 1.47977300  |
| 14 | C | 7.39409000  | 1.11634800  | -0.24191700 |
| 15 | C | 6.92428200  | 1.92258400  | -1.29727000 |
| 16 | C | 7.56458600  | 3.12589100  | -1.60119900 |
| 17 | C | 8.68763100  | 3.54109900  | -0.87483300 |
| 18 | C | 9.15959800  | 2.73774000  | 0.17060900  |
| 19 | C | 8.51823600  | 1.53981400  | 0.49414500  |
| 20 | H | 5.30464100  | -2.14537800 | -0.89173000 |
| 21 | H | 2.86404000  | -2.28274300 | -1.03082500 |
| 22 | H | 4.98779700  | 1.77462700  | 0.86523900  |
| 23 | H | 2.53217600  | 1.64236600  | 0.72558700  |
| 24 | H | 9.08383000  | -0.88300900 | -0.95366500 |
| 25 | H | 10.39431900 | -2.87114100 | -0.26732300 |
| 26 | H | 9.54625800  | -4.37949800 | 1.53280900  |
| 27 | H | 7.37027000  | -3.85729900 | 2.64155200  |
| 28 | H | 6.07270600  | -1.85511800 | 1.96779000  |
| 29 | H | 6.05720700  | 1.60006600  | -1.86766700 |
| 30 | H | 7.18702000  | 3.73568700  | -2.41940500 |
| 31 | H | 9.18599700  | 4.47641400  | -1.11824200 |
| 32 | H | 10.02554200 | 3.04974600  | 0.75108900  |
| 33 | H | 8.88026100  | 0.92603600  | 1.31488900  |
| 34 | C | 1.01171200  | -0.47058600 | -0.18250400 |
| 35 | C | 0.39470900  | -1.74420600 | -0.24566000 |
| 36 | C | 0.11017500  | 0.65271900  | -0.16840600 |
| 37 | C | -0.98546500 | -1.93473900 | -0.32952800 |
| 38 | C | -1.34851300 | 0.45639400  | -0.25843200 |
| 39 | C | -1.91077600 | -0.86662400 | -0.35972200 |
| 40 | N | 0.45398900  | 1.93996900  | -0.10036600 |
| 41 | N | -2.02677000 | 1.60815700  | -0.25429400 |
| 42 | S | -0.92697800 | 2.83554500  | -0.14304000 |
| 43 | H | -1.35543800 | -2.95618100 | -0.32828100 |
| 44 | H | 1.02159600  | -2.62934000 | -0.18203100 |
| 45 | C | -3.35744900 | -1.11911500 | -0.50179100 |
| 46 | C | -4.29648600 | -0.14787700 | -0.12969300 |
| 47 | C | -3.86365600 | -2.36449000 | -0.99310200 |
| 48 | C | -5.69354700 | -0.34808700 | -0.23668300 |
| 49 | H | -3.90519400 | 0.77785300  | 0.26119000  |
| 50 | C | -5.22522200 | -2.59307900 | -1.08416700 |
| 51 | H | -3.17838500 | -3.13975500 | -1.32049000 |

|    |   |              |             |             |
|----|---|--------------|-------------|-------------|
| 52 | C | -6.16070000  | -1.60836600 | -0.71583600 |
| 53 | H | -5.59003000  | -3.54413500 | -1.46760400 |
| 54 | C | -7.92824200  | 0.49140000  | 0.36564800  |
| 55 | C | -8.63217900  | -0.66238200 | -0.09066700 |
| 56 | C | -8.68482100  | 1.47685200  | 1.05923300  |
| 57 | C | -10.01356600 | -0.79584800 | 0.13821800  |
| 58 | H | -8.19673200  | 2.35823700  | 1.45380500  |
| 59 | C | -10.04780900 | 1.32770600  | 1.27435500  |
| 60 | C | -10.72700500 | 0.18695700  | 0.81238600  |
| 61 | H | -10.51507800 | -1.69050800 | -0.22483100 |
| 62 | H | -10.58395000 | 2.10280100  | 1.81594000  |
| 63 | H | -11.79319900 | 0.06770200  | 0.98483200  |
| 64 | N | -6.56408200  | 0.67293500  | 0.14263900  |
| 65 | S | -7.86877300  | -1.92085600 | -1.06013000 |
| 66 | C | -5.99565300  | 2.01463800  | 0.38289400  |
| 67 | H | -5.15422800  | 2.14250200  | -0.30096600 |
| 68 | H | -6.75177800  | 2.74577800  | 0.08594100  |
| 69 | C | -5.53985600  | 2.24334000  | 1.83668000  |
| 70 | H | -5.16211700  | 3.26708000  | 1.93756100  |
| 71 | H | -6.36078200  | 2.10136500  | 2.54796600  |
| 72 | H | -4.73400100  | 1.55378400  | 2.10641900  |

The cartesian coordinates of optimized ground state ( $S_0$ ) geometry in toluene

| No. | Symbols | X          | Y           | Z           |
|-----|---------|------------|-------------|-------------|
| 1   | N       | 6.69336000 | -0.14896400 | 0.19277600  |
| 2   | C       | 5.29049300 | -0.20484300 | 0.05581000  |
| 3   | C       | 4.66846000 | -1.32443400 | -0.53322800 |
| 4   | C       | 4.47651500 | 0.85718400  | 0.49813600  |
| 5   | C       | 3.28238500 | -1.37904600 | -0.65553800 |
| 6   | C       | 3.09109900 | 0.80158400  | 0.35596000  |
| 7   | C       | 2.45913500 | -0.32307900 | -0.21253700 |
| 8   | C       | 7.43094800 | -1.32694100 | 0.48119900  |
| 9   | C       | 8.65498000 | -1.57521900 | -0.16733900 |
| 10  | C       | 9.38611200 | -2.72896000 | 0.12895300  |
| 11  | C       | 8.90468000 | -3.65892300 | 1.05889400  |
| 12  | C       | 7.68318600 | -3.41619100 | 1.69962800  |
| 13  | C       | 6.95320500 | -2.25669700 | 1.42368800  |
| 14  | C       | 7.38055200 | 1.08486600  | 0.04783800  |
| 15  | C       | 7.02915000 | 1.98345600  | -0.97659000 |
| 16  | C       | 7.71032700 | 3.19650700  | -1.11073600 |
| 17  | C       | 8.75966000 | 3.52482500  | -0.24313800 |
| 18  | C       | 9.11596800 | 2.62673000  | 0.77062900  |
| 19  | C       | 8.42928300 | 1.41926800  | 0.92442700  |
| 20  | H       | 5.27844200 | -2.14440200 | -0.90257100 |
| 21  | H       | 2.83333900 | -2.24236100 | -1.14199400 |

|    |   |              |             |             |
|----|---|--------------|-------------|-------------|
| 22 | H | 4.93642700   | 1.72744500  | 0.95861400  |
| 23 | H | 2.49004900   | 1.63432300  | 0.70715400  |
| 24 | H | 9.02644000   | -0.85878900 | -0.89588800 |
| 25 | H | 10.33096700  | -2.90536300 | -0.38107900 |
| 26 | H | 9.47322200   | -4.55871100 | 1.28171400  |
| 27 | H | 7.29943700   | -4.12491600 | 2.43073200  |
| 28 | H | 6.01119900   | -2.06503600 | 1.93154200  |
| 29 | H | 6.22184400   | 1.72643700  | -1.65800600 |
| 30 | H | 7.42573700   | 3.88055100  | -1.90764800 |
| 31 | H | 9.29191100   | 4.46636000  | -0.35585200 |
| 32 | H | 9.92515300   | 2.86966400  | 1.45633300  |
| 33 | H | 8.70182600   | 0.72745900  | 1.71757900  |
| 34 | C | 0.98374900   | -0.43455600 | -0.32089500 |
| 35 | C | 0.33197600   | -1.64727200 | -0.20262100 |
| 36 | C | 0.12391400   | 0.70264700  | -0.56664700 |
| 37 | C | -1.08547600  | -1.79877000 | -0.31774100 |
| 38 | C | -1.32547200  | 0.54895100  | -0.67802200 |
| 39 | C | -1.95053700  | -0.74863000 | -0.55372800 |
| 40 | N | 0.51899800   | 1.96410400  | -0.74228600 |
| 41 | N | -1.94409100  | 1.70411600  | -0.92767500 |
| 42 | S | -0.80590500  | 2.85273500  | -1.01217600 |
| 43 | H | -1.49906000  | -2.79526900 | -0.17964200 |
| 44 | H | 0.91708200   | -2.53666500 | 0.01999200  |
| 45 | C | -3.41672100  | -0.95832500 | -0.68651900 |
| 46 | C | -4.33013900  | -0.00972700 | -0.18877700 |
| 47 | C | -3.90443300  | -2.13492300 | -1.27816600 |
| 48 | C | -5.72299100  | -0.19152000 | -0.28766800 |
| 49 | H | -3.92960200  | 0.88253600  | 0.26994100  |
| 50 | C | -5.28165400  | -2.33385300 | -1.38224400 |
| 51 | H | -3.21794200  | -2.87113800 | -1.68763900 |
| 52 | C | -6.18225900  | -1.36999100 | -0.92183100 |
| 53 | H | -5.67052400  | -3.23088500 | -1.85953800 |
| 54 | C | -7.91761900  | 0.41953000  | 0.64908100  |
| 55 | C | -8.60062400  | -0.69657600 | 0.10956700  |
| 56 | C | -8.59899300  | 1.17097700  | 1.63093700  |
| 57 | C | -9.86547500  | -1.07083100 | 0.57164600  |
| 58 | H | -8.13750200  | 2.04551100  | 2.07152900  |
| 59 | C | -9.88397600  | 0.81675000  | 2.05879100  |
| 60 | C | -10.52294900 | -0.31261100 | 1.54622600  |
| 61 | H | -10.34103200 | -1.94921500 | 0.14004300  |
| 62 | H | -10.37294700 | 1.43158300  | 2.81118300  |
| 63 | H | -11.51423400 | -0.59892500 | 1.88781600  |
| 64 | N | -6.62626600  | 0.77209200  | 0.20592200  |
| 65 | S | -7.91976500  | -1.57402500 | -1.29815800 |
| 66 | C | -6.09993400  | 2.08650200  | 0.57996000  |
| 67 | H | -5.35741100  | 2.36755700  | -0.17471100 |
| 68 | H | -6.92302500  | 2.80342400  | 0.48429800  |

|    |   |             |            |            |
|----|---|-------------|------------|------------|
| 69 | C | -5.47791300 | 2.18800400 | 1.99169400 |
| 70 | H | -5.13337300 | 3.21536800 | 2.16314000 |
| 71 | H | -6.19973800 | 1.93277700 | 2.77379700 |
| 72 | H | -4.62164700 | 1.51670200 | 2.10874400 |

The cartesian coordinates of optimized the first singlet excited state ( $S_1$ ) geometry in toluene

| No. | Symbols | X           | Y           | Z           |
|-----|---------|-------------|-------------|-------------|
| 1   | N       | 6.72670400  | -0.08685600 | 0.07669300  |
| 2   | C       | 5.32258600  | -0.18468600 | 0.05887000  |
| 3   | C       | 4.68132300  | -1.34615300 | -0.42782100 |
| 4   | C       | 4.51486900  | 0.88132500  | 0.51046600  |
| 5   | C       | 3.29620600  | -1.42912700 | -0.45274300 |
| 6   | C       | 3.12836300  | 0.79810200  | 0.46779500  |
| 7   | C       | 2.46540300  | -0.36459200 | -0.00753100 |
| 8   | C       | 7.52310700  | -1.23174800 | 0.33036000  |
| 9   | C       | 8.69624700  | -1.46069200 | -0.41413700 |
| 10  | C       | 9.48407800  | -2.58469300 | -0.15449000 |
| 11  | C       | 9.11194300  | -3.50277100 | 0.83586600  |
| 12  | C       | 7.94171700  | -3.27902200 | 1.57270600  |
| 13  | C       | 7.15384800  | -2.15067200 | 1.33159900  |
| 14  | C       | 7.35897300  | 1.15420800  | -0.19396800 |
| 15  | C       | 6.87732400  | 1.99040600  | -1.21921500 |
| 16  | C       | 7.50297500  | 3.21205000  | -1.47912600 |
| 17  | C       | 8.62210600  | 3.61173100  | -0.73744500 |
| 18  | C       | 9.10693600  | 2.77603700  | 0.27688300  |
| 19  | C       | 8.47981600  | 1.55895800  | 0.55555600  |
| 20  | H       | 5.28020300  | -2.17036300 | -0.80631800 |
| 21  | H       | 2.84515600  | -2.32117500 | -0.87854400 |
| 22  | H       | 4.98666400  | 1.77946100  | 0.90070600  |
| 23  | H       | 2.53365800  | 1.63469600  | 0.81511600  |
| 24  | H       | 8.98152300  | -0.75531500 | -1.19042000 |
| 25  | H       | 10.38678100 | -2.74812100 | -0.73955700 |
| 26  | H       | 9.72512800  | -4.37932700 | 1.03118500  |
| 27  | H       | 7.64388600  | -3.97870900 | 2.35091400  |
| 28  | H       | 6.25263600  | -1.97193200 | 1.91266700  |
| 29  | H       | 6.01463300  | 1.67753100  | -1.80187800 |
| 30  | H       | 7.11871800  | 3.84735000  | -2.27435600 |
| 31  | H       | 9.10928300  | 4.56120200  | -0.94650100 |
| 32  | H       | 9.97112500  | 3.07629500  | 0.86587500  |
| 33  | H       | 8.85063300  | 0.91601400  | 1.34992800  |
| 34  | C       | 1.00423900  | -0.49242100 | -0.04087900 |
| 35  | C       | 0.39261200  | -1.77240400 | -0.07485200 |
| 36  | C       | 0.10633500  | 0.63578600  | -0.04556800 |
| 37  | C       | -0.98126800 | -1.95777500 | -0.14931500 |
| 38  | C       | -1.34812900 | 0.44364700  | -0.12323500 |
| 39  | C       | -1.91109400 | -0.88168100 | -0.19916900 |
| 40  | N       | 0.46827400  | 1.92166600  | -0.01258700 |
| 41  | N       | -2.02707100 | 1.59777500  | -0.14013300 |

|    |   |              |             |             |
|----|---|--------------|-------------|-------------|
| 42 | S | -0.91462100  | 2.82828600  | -0.06640600 |
| 43 | H | -1.34773700  | -2.97865400 | -0.12095100 |
| 44 | H | 1.02026500   | -2.65502100 | 0.00593800  |
| 45 | C | -3.34686500  | -1.14541900 | -0.32572400 |
| 46 | C | -4.31056100  | -0.14155400 | -0.10043800 |
| 47 | C | -3.82746200  | -2.44420400 | -0.68303200 |
| 48 | C | -5.69266200  | -0.36495300 | -0.22693500 |
| 49 | H | -3.94020100  | 0.83205100  | 0.17681200  |
| 50 | C | -5.18263800  | -2.69258800 | -0.79435800 |
| 51 | H | -3.13527100  | -3.25026500 | -0.89991100 |
| 52 | C | -6.13013800  | -1.67536300 | -0.57144300 |
| 53 | H | -5.53306200  | -3.68517000 | -1.07022300 |
| 54 | C | -7.96059600  | 0.51230200  | 0.20210200  |
| 55 | C | -8.63539600  | -0.70250000 | -0.09490100 |
| 56 | C | -8.74682600  | 1.56136100  | 0.74491600  |
| 57 | C | -10.01329000 | -0.84675500 | 0.13694600  |
| 58 | H | -8.28656800  | 2.50189600  | 1.01822100  |
| 59 | C | -10.11361100 | 1.40985900  | 0.96084600  |
| 60 | C | -10.76130400 | 0.20361700  | 0.65884100  |
| 61 | H | -10.48739000 | -1.79646000 | -0.10257100 |
| 62 | H | -10.67346300 | 2.24224200  | 1.38010300  |
| 63 | H | -11.82689300 | 0.08342300  | 0.83360900  |
| 64 | N | -6.59560500  | 0.68901600  | -0.03626200 |
| 65 | S | -7.81981700  | -2.07749200 | -0.85871000 |
| 66 | C | -6.05506700  | 2.05719900  | 0.02197700  |
| 67 | H | -5.20899500  | 2.10766500  | -0.66818700 |
| 68 | H | -6.82279400  | 2.72556200  | -0.37784900 |
| 69 | C | -5.61977800  | 2.50582200  | 1.43103600  |
| 70 | H | -5.28057100  | 3.54720700  | 1.38864100  |
| 71 | H | -6.44517900  | 2.43656300  | 2.14808900  |
| 72 | H | -4.79321800  | 1.89360500  | 1.80470400  |

The cartesian coordinates of optimized the first triplet excited state ( $T_1$ ) geometry in toluene

| No. | Symbols | X          | Y           | Z           |
|-----|---------|------------|-------------|-------------|
| 1   | N       | 6.56693300 | -0.04912100 | -0.27295000 |
| 2   | C       | 5.19932600 | -0.13974800 | 0.01975300  |
| 3   | C       | 4.52227200 | -1.38305900 | -0.03957400 |
| 4   | C       | 4.44932700 | 1.00610300  | 0.38418900  |
| 5   | C       | 3.17624800 | -1.47438000 | 0.26685000  |
| 6   | C       | 3.10022200 | 0.91850900  | 0.68159400  |
| 7   | C       | 2.39864800 | -0.33085400 | 0.64624600  |
| 8   | C       | 7.44040900 | -1.13698700 | 0.00321500  |
| 9   | C       | 8.41196400 | -1.51858500 | -0.93905000 |
| 10  | C       | 9.28146200 | -2.57658400 | -0.65966900 |
| 11  | C       | 9.18599400 | -3.27525700 | 0.55040600  |
| 12  | C       | 8.21527600 | -2.89799200 | 1.48679800  |
| 13  | C       | 7.35224900 | -1.83041100 | 1.22381200  |

|    |   |              |             |             |
|----|---|--------------|-------------|-------------|
| 14 | C | 7.11040500   | 1.13632100  | -0.84075700 |
| 15 | C | 6.45131100   | 1.78725400  | -1.89903700 |
| 16 | C | 6.99360700   | 2.95130400  | -2.45117200 |
| 17 | C | 8.20329300   | 3.46927100  | -1.97187800 |
| 18 | C | 8.86479100   | 2.81423100  | -0.92548500 |
| 19 | C | 8.32211500   | 1.65933100  | -0.35547900 |
| 20 | H | 5.06681700   | -2.27403300 | -0.33962700 |
| 21 | H | 2.70323500   | -2.44642800 | 0.17143000  |
| 22 | H | 4.94684700   | 1.97037100  | 0.44275300  |
| 23 | H | 2.56370100   | 1.81349200  | 0.97359900  |
| 24 | H | 8.48048900   | -0.98060800 | -1.88139300 |
| 25 | H | 10.02856000  | -2.86119900 | -1.39758400 |
| 26 | H | 9.86050300   | -4.10163600 | 0.76172700  |
| 27 | H | 8.13582900   | -3.42604300 | 2.43473800  |
| 28 | H | 6.60717500   | -1.52893200 | 1.95605700  |
| 29 | H | 5.51797500   | 1.37853400  | -2.27865900 |
| 30 | H | 6.47253000   | 3.44574900  | -3.26829700 |
| 31 | H | 8.62531600   | 4.37122500  | -2.40879800 |
| 32 | H | 9.80285900   | 3.20841400  | -0.54032800 |
| 33 | H | 8.83090000   | 1.15517300  | 0.46248000  |
| 34 | C | 1.00396000   | -0.45997400 | 0.94268400  |
| 35 | C | 0.37094500   | -1.83075000 | 1.04516000  |
| 36 | C | 0.08006200   | 0.64635100  | 1.20401200  |
| 37 | C | -0.94527900  | -2.02859300 | 0.97639800  |
| 38 | C | -1.37707500  | 0.43240400  | 1.12647800  |
| 39 | C | -1.91701100  | -0.88540000 | 0.76517100  |
| 40 | N | 0.40662500   | 1.89118600  | 1.46245300  |
| 41 | N | -2.07882700  | 1.51989200  | 1.33810300  |
| 42 | S | -1.01159000  | 2.78615800  | 1.63880700  |
| 43 | H | -1.35349300  | -3.01674100 | 1.16687200  |
| 44 | H | 1.02093400   | -2.66841800 | 1.28338600  |
| 45 | C | -3.23285800  | -1.13673000 | 0.24671200  |
| 46 | C | -4.21723900  | -0.10729500 | 0.14629600  |
| 47 | C | -3.59282100  | -2.44555200 | -0.19224200 |
| 48 | C | -5.49448600  | -0.33538600 | -0.37330900 |
| 49 | H | -3.93877300  | 0.87340000  | 0.49760800  |
| 50 | C | -4.85650900  | -2.68103200 | -0.71478000 |
| 51 | H | -2.88392600  | -3.26450400 | -0.15145900 |
| 52 | C | -5.80074100  | -1.64933400 | -0.82707600 |
| 53 | H | -5.12467600  | -3.67599200 | -1.06360300 |
| 54 | C | -7.82342000  | 0.46085000  | -0.44480800 |
| 55 | C | -8.36835100  | -0.76266300 | -0.89933100 |
| 56 | C | -8.73553900  | 1.43170000  | 0.02348500  |
| 57 | C | -9.74195800  | -1.01603000 | -0.84404000 |
| 58 | H | -8.37666800  | 2.38976700  | 0.37871200  |
| 59 | C | -10.11321100 | 1.18820000  | 0.04052400  |
| 60 | C | -10.62846100 | -0.03869300 | -0.38050600 |

|    |   |              |             |             |
|----|---|--------------|-------------|-------------|
| 61 | H | -10.11182400 | -1.97975100 | -1.18827500 |
| 62 | H | -10.77862800 | 1.96899500  | 0.40197000  |
| 63 | H | -11.69688500 | -0.23608400 | -0.35482300 |
| 64 | N | -6.43657600  | 0.70543900  | -0.47881000 |
| 65 | S | -7.32083200  | -1.98453400 | -1.69106800 |
| 66 | C | -5.97474900  | 2.08332900  | -0.28999900 |
| 67 | H | -5.00819500  | 2.17696500  | -0.79753100 |
| 68 | H | -6.67334700  | 2.72955800  | -0.83230600 |
| 69 | C | -5.84403900  | 2.55838500  | 1.17511800  |
| 70 | H | -5.63066000  | 3.63441500  | 1.18666100  |
| 71 | H | -6.76601000  | 2.38391500  | 1.73936900  |
| 72 | H | -5.02973500  | 2.04913600  | 1.69965700  |

The cartesian coordinates of optimized the second triplet excited state ( $T_2$ ) geometry in toluene

| No. | Symbols | X           | Y           | Z           |
|-----|---------|-------------|-------------|-------------|
| 1   | N       | 6.71021300  | -0.12656300 | 0.12321100  |
| 2   | C       | 5.29650700  | -0.19461800 | 0.02636700  |
| 3   | C       | 4.66507300  | -1.33269500 | -0.50724800 |
| 4   | C       | 4.48926600  | 0.87530700  | 0.45098800  |
| 5   | C       | 3.28378800  | -1.39432200 | -0.59782800 |
| 6   | C       | 3.10757700  | 0.81250400  | 0.34575900  |
| 7   | C       | 2.45049100  | -0.32990700 | -0.17212900 |
| 8   | C       | 7.44862700  | -1.26916200 | 0.52890300  |
| 9   | C       | 8.66109600  | -1.59747600 | -0.10173600 |
| 10  | C       | 9.38197200  | -2.71765100 | 0.30493800  |
| 11  | C       | 8.90498800  | -3.53591100 | 1.33181900  |
| 12  | C       | 7.69646800  | -3.21596000 | 1.95515200  |
| 13  | C       | 6.97414300  | -2.09054300 | 1.56600200  |
| 14  | C       | 7.38674300  | 1.08267800  | -0.18779600 |
| 15  | C       | 6.97909900  | 1.86415800  | -1.28243000 |
| 16  | C       | 7.64015100  | 3.05362200  | -1.57870200 |
| 17  | C       | 8.72208800  | 3.47810500  | -0.80372300 |
| 18  | C       | 9.13293100  | 2.70002600  | 0.28129100  |
| 19  | C       | 8.47021300  | 1.51603800  | 0.59556200  |
| 20  | H       | 5.26799900  | -2.15874500 | -0.86965000 |
| 21  | H       | 2.84053300  | -2.27195100 | -1.05528700 |
| 22  | H       | 4.95509000  | 1.75860300  | 0.87555800  |
| 23  | H       | 2.51051100  | 1.65283000  | 0.67306900  |
| 24  | H       | 9.02784900  | -0.97448700 | -0.91023200 |
| 25  | H       | 10.31557800 | -2.95915100 | -0.19485900 |
| 26  | H       | 9.46736000  | -4.41113100 | 1.64182800  |
| 27  | H       | 7.31732000  | -3.83834900 | 2.76047300  |
| 28  | H       | 6.04356100  | -1.83741700 | 2.06198900  |
| 29  | H       | 6.14739000  | 1.53252100  | -1.89415200 |
| 30  | H       | 7.31330800  | 3.64512300  | -2.42885400 |
| 31  | H       | 9.23724600  | 4.40361900  | -1.04121000 |
| 32  | H       | 9.96638600  | 3.02270000  | 0.89852000  |

|    |   |              |             |             |
|----|---|--------------|-------------|-------------|
| 33 | H | 8.78244500   | 0.92416800  | 1.44911200  |
| 34 | C | 0.98955900   | -0.43531500 | -0.26115800 |
| 35 | C | 0.36772600   | -1.70809300 | -0.29895400 |
| 36 | C | 0.11293300   | 0.69892800  | -0.30470000 |
| 37 | C | -1.00582600  | -1.87866400 | -0.40427800 |
| 38 | C | -1.33356500  | 0.51733500  | -0.42280100 |
| 39 | C | -1.89941300  | -0.79143100 | -0.48780100 |
| 40 | N | 0.49768700   | 1.98783400  | -0.27295100 |
| 41 | N | -2.03096500  | 1.67117200  | -0.48067400 |
| 42 | S | -0.90173700  | 2.91711200  | -0.38072100 |
| 43 | H | -1.40376400  | -2.88807000 | -0.38114800 |
| 44 | H | 0.98288900   | -2.59460800 | -0.19199900 |
| 45 | C | -3.35396100  | -1.02959400 | -0.64414000 |
| 46 | C | -4.28421800  | -0.11973500 | -0.13518500 |
| 47 | C | -3.85372900  | -2.19138000 | -1.27192300 |
| 48 | C | -5.67890700  | -0.31205100 | -0.24274700 |
| 49 | H | -3.89107200  | 0.75725200  | 0.35009500  |
| 50 | C | -5.21844800  | -2.41746400 | -1.36108500 |
| 51 | H | -3.16957700  | -2.91286700 | -1.70308600 |
| 52 | C | -6.14088400  | -1.49231900 | -0.86355000 |
| 53 | H | -5.58513900  | -3.31602400 | -1.84867100 |
| 54 | C | -7.91017100  | 0.42997700  | 0.51334600  |
| 55 | C | -8.60134100  | -0.68297100 | -0.04199100 |
| 56 | C | -8.66056900  | 1.31759000  | 1.32274200  |
| 57 | C | -9.96376100  | -0.87823400 | 0.22184200  |
| 58 | H | -8.18132800  | 2.16722500  | 1.78567900  |
| 59 | C | -10.00959000 | 1.11381400  | 1.56467800  |
| 60 | C | -10.67341100 | 0.01056900  | 1.01565400  |
| 61 | H | -10.46020600 | -1.74019400 | -0.21275700 |
| 62 | H | -10.54430600 | 1.81581800  | 2.19557100  |
| 63 | H | -11.72763900 | -0.15416800 | 1.20942500  |
| 64 | N | -6.55316800  | 0.66277100  | 0.27385300  |
| 65 | S | -7.85349000  | -1.79605300 | -1.17410100 |
| 66 | C | -5.99227300  | 1.98980500  | 0.62920300  |
| 67 | H | -5.18259000  | 2.19618800  | -0.06982100 |
| 68 | H | -6.76827000  | 2.72863700  | 0.42396400  |
| 69 | C | -5.49256900  | 2.10642300  | 2.07376500  |
| 70 | H | -5.11178700  | 3.11871500  | 2.23639800  |
| 71 | H | -6.28496300  | 1.91698700  | 2.80194000  |
| 72 | H | -4.68038600  | 1.40503000  | 2.27456200  |

The cartesian coordinates of optimized ground state ( $S_0$ ) geometry in Tetrahydrofuran

| No. | Symbols | X          | Y           | Z           |
|-----|---------|------------|-------------|-------------|
| 1   | N       | 6.68691900 | -0.14458900 | 0.20298500  |
| 2   | C       | 5.28514700 | -0.20836000 | 0.06323800  |
| 3   | C       | 4.66879000 | -1.33228600 | -0.52444100 |



|    |   |             |             |             |
|----|---|-------------|-------------|-------------|
| 4  | C | 4.46492900  | 0.85093800  | 0.50226200  |
| 5  | C | 3.28293100  | -1.39333300 | -0.65110100 |
| 6  | C | 3.08003400  | 0.78902500  | 0.35573700  |
| 7  | C | 2.45442700  | -0.33870700 | -0.21434000 |
| 8  | C | 7.43393000  | -1.31916500 | 0.48360000  |
| 9  | C | 8.65761400  | -1.55458100 | -0.17065400 |
| 10 | C | 9.39961600  | -2.70388800 | 0.11773500  |
| 11 | C | 8.92885600  | -3.64188600 | 1.04570300  |
| 12 | C | 7.70740400  | -3.41194900 | 1.69218700  |
| 13 | C | 6.96688100  | -2.25681300 | 1.42384300  |
| 14 | C | 7.36697800  | 1.09474800  | 0.06577100  |
| 15 | C | 7.02045000  | 1.99117200  | -0.96236000 |
| 16 | C | 7.69490600  | 3.20922700  | -1.08927000 |
| 17 | C | 8.73293300  | 3.54426200  | -0.20997600 |
| 18 | C | 9.08478500  | 2.64805200  | 0.80764700  |
| 19 | C | 8.40425400  | 1.43561300  | 0.95361200  |
| 20 | H | 5.28164900  | -2.15180800 | -0.88988200 |
| 21 | H | 2.83904900  | -2.26135800 | -1.13398500 |
| 22 | H | 4.91832700  | 1.72358700  | 0.96463700  |
| 23 | H | 2.47459100  | 1.61847100  | 0.70775900  |
| 24 | H | 9.02116700  | -0.83288300 | -0.89805900 |
| 25 | H | 10.34398000 | -2.87032900 | -0.39651000 |
| 26 | H | 9.50545100  | -4.53801600 | 1.26261600  |
| 27 | H | 7.33191100  | -4.12694900 | 2.42143400  |
| 28 | H | 6.02540600  | -2.07595200 | 1.93675000  |
| 29 | H | 6.22311400  | 1.72922000  | -1.65363900 |
| 30 | H | 7.41451800  | 3.89142900  | -1.88924600 |
| 31 | H | 9.26011600  | 4.48935500  | -0.31686100 |
| 32 | H | 9.88512600  | 2.89607700  | 1.50184200  |
| 33 | H | 8.67339100  | 0.74585800  | 1.74982800  |
| 34 | C | 0.97943600  | -0.45289600 | -0.32929300 |
| 35 | C | 0.32725400  | -1.66427900 | -0.19861300 |
| 36 | C | 0.12305800  | 0.68166200  | -0.59717200 |
| 37 | C | -1.09056000 | -1.81514800 | -0.31466700 |
| 38 | C | -1.32508400 | 0.52865500  | -0.71018000 |
| 39 | C | -1.95223700 | -0.76522700 | -0.56407700 |
| 40 | N | 0.52076900  | 1.93922000  | -0.79780500 |
| 41 | N | -1.94046800 | 1.67999600  | -0.98668100 |
| 42 | S | -0.80095900 | 2.82544800  | -1.08996400 |
| 43 | H | -1.50488100 | -2.80977400 | -0.16570100 |
| 44 | H | 0.90982300  | -2.55244200 | 0.03524500  |
| 45 | C | -3.42015500 | -0.97022200 | -0.69038500 |
| 46 | C | -4.32623900 | -0.01549700 | -0.19010700 |
| 47 | C | -3.91551700 | -2.14641100 | -1.27709600 |
| 48 | C | -5.72108200 | -0.18961400 | -0.28291000 |
| 49 | H | -3.91881600 | 0.87381300  | 0.26866500  |
| 50 | C | -5.29462000 | -2.33751400 | -1.37665200 |

|    |   |              |             |             |
|----|---|--------------|-------------|-------------|
| 51 | H | -3.23517600  | -2.88920500 | -1.68494000 |
| 52 | C | -6.18758700  | -1.36676000 | -0.91504200 |
| 53 | H | -5.68910300  | -3.23334300 | -1.85165800 |
| 54 | C | -7.90804700  | 0.43119600  | 0.66369700  |
| 55 | C | -8.60019400  | -0.68071900 | 0.12672300  |
| 56 | C | -8.58052900  | 1.18444900  | 1.65095600  |
| 57 | C | -9.86493700  | -1.05057500 | 0.59408400  |
| 58 | H | -8.11385900  | 2.05644300  | 2.09104500  |
| 59 | C | -9.86480400  | 0.83484900  | 2.08535400  |
| 60 | C | -10.51284700 | -0.29084700 | 1.57423000  |
| 61 | H | -10.34843000 | -1.92495800 | 0.16304400  |
| 62 | H | -10.34627800 | 1.45069600  | 2.84169100  |
| 63 | H | -11.50366900 | -0.57280300 | 1.92077400  |
| 64 | N | -6.61755100  | 0.77880400  | 0.21312900  |
| 65 | S | -7.92879900  | -1.55932700 | -1.28639500 |
| 66 | C | -6.08098500  | 2.08939100  | 0.59296700  |
| 67 | H | -5.34034700  | 2.36968300  | -0.16357400 |
| 68 | H | -6.89943200  | 2.81198300  | 0.50410600  |
| 69 | C | -5.45304600  | 2.17952600  | 2.00229000  |
| 70 | H | -5.09950500  | 3.20353000  | 2.17391500  |
| 71 | H | -6.17464300  | 1.93031100  | 2.78650200  |
| 72 | H | -4.60188900  | 1.50086000  | 2.11473400  |

The cartesian coordinates of optimized the first singlet excited state ( $S_1$ ) geometry in Tetrahydrofuran

| No. | Symbols | X          | Y           | Z           |
|-----|---------|------------|-------------|-------------|
| 1   | N       | 6.70911700 | -0.10240800 | 0.08181000  |
| 2   | C       | 5.31933600 | -0.18034700 | 0.02713400  |
| 3   | C       | 4.67044700 | -1.37228200 | -0.39014900 |
| 4   | C       | 4.50740400 | 0.92814300  | 0.37856400  |
| 5   | C       | 3.29048200 | -1.44541000 | -0.43811800 |
| 6   | C       | 3.12592300 | 0.85098300  | 0.31613900  |
| 7   | C       | 2.45397000 | -0.34224300 | -0.08481300 |
| 8   | C       | 7.49600200 | -1.26303800 | 0.31991900  |
| 9   | C       | 8.65092300 | -1.49566400 | -0.44909700 |
| 10  | C       | 9.43482300 | -2.62613100 | -0.20514000 |
| 11  | C       | 9.07487100 | -3.53754200 | 0.79678000  |
| 12  | C       | 7.92362100 | -3.30508700 | 1.56112600  |
| 13  | C       | 7.13812400 | -2.17191800 | 1.33292100  |
| 14  | C       | 7.37850200 | 1.13976300  | -0.09662000 |
| 15  | C       | 7.00115600 | 2.01044300  | -1.13578800 |
| 16  | C       | 7.67162000 | 3.22494500  | -1.30426000 |
| 17  | C       | 8.72770500 | 3.57801100  | -0.45348200 |
| 18  | C       | 9.10800900 | 2.70523000  | 0.57490400  |
| 19  | C       | 8.43765200 | 1.49342300  | 0.75935900  |
| 20  | H       | 5.26602600 | -2.22565900 | -0.70140200 |
| 21  | H       | 2.84628900 | -2.36318600 | -0.81157600 |
| 22  | H       | 4.97768200 | 1.84640800  | 0.71905300  |

|    |   |              |             |             |
|----|---|--------------|-------------|-------------|
| 23 | H | 2.53543000   | 1.71355800  | 0.60076300  |
| 24 | H | 8.92343900   | -0.79150900 | -1.23129700 |
| 25 | H | 10.32399500  | -2.79881200 | -0.80748200 |
| 26 | H | 9.68594000   | -4.41786800 | 0.98146300  |
| 27 | H | 7.64031800   | -3.99997100 | 2.34863000  |
| 28 | H | 6.25301600   | -1.98167900 | 1.93502600  |
| 29 | H | 6.19064200   | 1.72864900  | -1.80342100 |
| 30 | H | 7.37410700   | 3.88992100  | -2.11205700 |
| 31 | H | 9.24963800   | 4.52191500  | -0.59170300 |
| 32 | H | 9.92323000   | 2.97114900  | 1.24421300  |
| 33 | H | 8.72506100   | 0.81871700  | 1.56193300  |
| 34 | C | 1.00358800   | -0.46215000 | -0.12744100 |
| 35 | C | 0.38000200   | -1.74713000 | -0.11771200 |
| 36 | C | 0.10433100   | 0.66726100  | -0.17493400 |
| 37 | C | -0.98914700  | -1.93029800 | -0.17593000 |
| 38 | C | -1.35275800  | 0.47401600  | -0.24213600 |
| 39 | C | -1.92591200  | -0.85361100 | -0.26228700 |
| 40 | N | 0.46579400   | 1.95154900  | -0.19923300 |
| 41 | N | -2.02673600  | 1.62545200  | -0.30951700 |
| 42 | S | -0.91805000  | 2.85959600  | -0.28863500 |
| 43 | H | -1.35702200  | -2.94817300 | -0.10581100 |
| 44 | H | 1.00149900   | -2.63024200 | -0.00544800 |
| 45 | C | -3.35749400  | -1.12105200 | -0.36212700 |
| 46 | C | -4.32897300  | -0.10903800 | -0.15803800 |
| 47 | C | -3.83205800  | -2.43363500 | -0.66223700 |
| 48 | C | -5.70895200  | -0.34437800 | -0.25548300 |
| 49 | H | -3.96341100  | 0.87695600  | 0.07750700  |
| 50 | C | -5.18972500  | -2.68832000 | -0.75094000 |
| 51 | H | -3.14103300  | -3.24618900 | -0.85781100 |
| 52 | C | -6.13702500  | -1.66673800 | -0.55855300 |
| 53 | H | -5.53967400  | -3.69051300 | -0.99001100 |
| 54 | C | -7.97264100  | 0.50264000  | 0.25525700  |
| 55 | C | -8.63575600  | -0.72654700 | 0.01383500  |
| 56 | C | -8.74097600  | 1.53370100  | 0.84677700  |
| 57 | C | -9.97965000  | -0.91499900 | 0.36328900  |
| 58 | H | -8.29132800  | 2.49363300  | 1.06635900  |
| 59 | C | -10.08637400 | 1.34661800  | 1.17077200  |
| 60 | C | -10.71758700 | 0.12026100  | 0.93864000  |
| 61 | H | -10.44267100 | -1.88019100 | 0.16769600  |
| 62 | H | -10.63562600 | 2.17069900  | 1.61998700  |
| 63 | H | -11.76137300 | -0.03074700 | 1.20039200  |
| 64 | N | -6.62742000  | 0.70472800  | -0.08903200 |
| 65 | S | -7.83422300  | -2.06617300 | -0.85097000 |
| 66 | C | -6.11100100  | 2.07948200  | -0.08383600 |
| 67 | H | -5.29686500  | 2.12539400  | -0.81368700 |
| 68 | H | -6.90705600  | 2.72705600  | -0.46423100 |
| 69 | C | -5.61820800  | 2.58457800  | 1.28841100  |

|    |   |             |            |            |
|----|---|-------------|------------|------------|
| 70 | H | -5.29708900 | 3.62864000 | 1.19399500 |
| 71 | H | -6.40853500 | 2.53317900 | 2.04467400 |
| 72 | H | -4.76908100 | 1.99718600 | 1.65149900 |

The cartesian coordinates of optimized the first triplet excited state ( $T_1$ ) geometry in Tetrahydrofuran

| No. | Symbols | X           | Y           | Z           |
|-----|---------|-------------|-------------|-------------|
| 1   | N       | 6.55058300  | -0.04296800 | -0.29581000 |
| 2   | C       | 5.18633100  | -0.13770700 | 0.00499400  |
| 3   | C       | 4.51582800  | -1.38624600 | -0.03273700 |
| 4   | C       | 4.42980600  | 1.00812900  | 0.35833400  |
| 5   | C       | 3.17280100  | -1.48335600 | 0.28445600  |
| 6   | C       | 3.08396200  | 0.91416300  | 0.66864200  |
| 7   | C       | 2.38980300  | -0.34041600 | 0.65748500  |
| 8   | C       | 7.43136500  | -1.12582000 | -0.01849900 |
| 9   | C       | 8.39260000  | -1.51324400 | -0.96891100 |
| 10  | C       | 9.27000200  | -2.56517800 | -0.68908800 |
| 11  | C       | 9.19202400  | -3.25095800 | 0.53010300  |
| 12  | C       | 8.23131800  | -2.86743700 | 1.47486000  |
| 13  | C       | 7.36065200  | -1.80583400 | 1.21075300  |
| 14  | C       | 7.08928700  | 1.14399200  | -0.86645600 |
| 15  | C       | 6.43271200  | 1.78445600  | -1.93276100 |
| 16  | C       | 6.97128800  | 2.94927200  | -2.48803700 |
| 17  | C       | 8.17458400  | 3.47785600  | -2.00293500 |
| 18  | C       | 8.83354600  | 2.83306500  | -0.94801900 |
| 19  | C       | 8.29431000  | 1.67727500  | -0.37553000 |
| 20  | H       | 5.06290300  | -2.27845700 | -0.32423700 |
| 21  | H       | 2.70793500  | -2.46088000 | 0.20711200  |
| 22  | H       | 4.91902200  | 1.97749000  | 0.39940900  |
| 23  | H       | 2.54494200  | 1.81040100  | 0.95208800  |
| 24  | H       | 8.44738500  | -0.98597500 | -1.91828800 |
| 25  | H       | 10.00910200 | -2.85492900 | -1.43300200 |
| 26  | H       | 9.87239200  | -4.07242200 | 0.74196500  |
| 27  | H       | 8.16568900  | -3.38551100 | 2.42931800  |
| 28  | H       | 6.62398400  | -1.49962500 | 1.94958300  |
| 29  | H       | 5.50547100  | 1.36710400  | -2.31811900 |
| 30  | H       | 6.45308100  | 3.43540400  | -3.31194000 |
| 31  | H       | 8.59390600  | 4.37990000  | -2.44233500 |
| 32  | H       | 9.76646000  | 3.23542600  | -0.55885200 |
| 33  | H       | 8.80115500  | 1.18143400  | 0.44878300  |
| 34  | C       | 0.99945100  | -0.47454600 | 0.96943000  |
| 35  | C       | 0.36937300  | -1.84626300 | 1.07652000  |
| 36  | C       | 0.07695800  | 0.62792200  | 1.25429900  |
| 37  | C       | -0.94739200 | -2.04814700 | 1.01897900  |
| 38  | C       | -1.38049700 | 0.41001500  | 1.18993000  |
| 39  | C       | -1.91910000 | -0.90521900 | 0.80998900  |
| 40  | N       | 0.40019100  | 1.86926900  | 1.53326300  |
| 41  | N       | -2.08495900 | 1.48743200  | 1.43428500  |

|    |   |              |             |             |
|----|---|--------------|-------------|-------------|
| 42 | S | -1.02203900  | 2.75396000  | 1.74556800  |
| 43 | H | -1.35197500  | -3.03732600 | 1.21117100  |
| 44 | H | 1.02200200   | -2.68428100 | 1.30610000  |
| 45 | C | -3.23013600  | -1.14860200 | 0.27499400  |
| 46 | C | -4.20543200  | -0.11218900 | 0.15613800  |
| 47 | C | -3.59109500  | -2.45751700 | -0.16208000 |
| 48 | C | -5.47864700  | -0.33482800 | -0.37769900 |
| 49 | H | -3.92548800  | 0.86958400  | 0.50362500  |
| 50 | C | -4.84968200  | -2.68781000 | -0.69975800 |
| 51 | H | -2.88941200  | -3.28165600 | -0.10493600 |
| 52 | C | -5.78518100  | -1.64995900 | -0.82858800 |
| 53 | H | -5.11833100  | -3.68296200 | -1.04750500 |
| 54 | C | -7.80242500  | 0.47209500  | -0.47954200 |
| 55 | C | -8.34870300  | -0.75062300 | -0.93476000 |
| 56 | C | -8.71511000  | 1.44879000  | -0.02370300 |
| 57 | C | -9.72405500  | -0.99938900 | -0.89235700 |
| 58 | H | -8.35723900  | 2.40779400  | 0.33002200  |
| 59 | C | -10.09404900 | 1.21028000  | -0.01866300 |
| 60 | C | -10.61074000 | -0.01651500 | -0.44017000 |
| 61 | H | -10.09538700 | -1.96216400 | -1.23775900 |
| 62 | H | -10.75948300 | 1.99529100  | 0.33338500  |
| 63 | H | -11.68017200 | -0.20942200 | -0.42398400 |
| 64 | N | -6.41350600  | 0.71043000  | -0.50175700 |
| 65 | S | -7.29682200  | -1.97996300 | -1.71132300 |
| 66 | C | -5.94716000  | 2.08734600  | -0.30797600 |
| 67 | H | -4.97519500  | 2.17635700  | -0.80565200 |
| 68 | H | -6.63513900  | 2.73790000  | -0.85789000 |
| 69 | C | -5.83092500  | 2.56160300  | 1.15820100  |
| 70 | H | -5.59947900  | 3.63367400  | 1.17022800  |
| 71 | H | -6.76432400  | 2.40550000  | 1.70863500  |
| 72 | H | -5.03424600  | 2.03851400  | 1.69625500  |

The cartesian coordinates of optimized the second triplet excited state ( $T_2$ ) geometry in Tetrahydrofuran

| No. | Symbols | X          | Y           | Z           |
|-----|---------|------------|-------------|-------------|
| 1   | N       | 6.70690500 | -0.13064600 | 0.13843300  |
| 2   | C       | 5.29611400 | -0.19423400 | 0.02996700  |
| 3   | C       | 4.66354100 | -1.33129800 | -0.50633300 |
| 4   | C       | 4.48757000 | 0.87861100  | 0.44728400  |
| 5   | C       | 3.28232200 | -1.38931100 | -0.60704600 |
| 6   | C       | 3.10618000 | 0.81865200  | 0.33116900  |
| 7   | C       | 2.44916800 | -0.32166200 | -0.19030800 |
| 8   | C       | 7.44444100 | -1.28379000 | 0.52079600  |
| 9   | C       | 8.65054800 | -1.60410700 | -0.12527600 |
| 10  | C       | 9.37272000 | -2.73220700 | 0.25804800  |
| 11  | C       | 8.90201700 | -3.56495900 | 1.27661500  |
| 12  | C       | 7.69956900 | -3.25205600 | 1.91583400  |
| 13  | C       | 6.97667800 | -2.11863300 | 1.54985900  |

|    |   |              |             |             |
|----|---|--------------|-------------|-------------|
| 14 | C | 7.39025700   | 1.08508500  | -0.13589400 |
| 15 | C | 7.01134100   | 1.88368600  | -1.22830200 |
| 16 | C | 7.68052700   | 3.07759100  | -1.48862600 |
| 17 | C | 8.74248200   | 3.48821100  | -0.67866900 |
| 18 | C | 9.12549700   | 2.69207600  | 0.40389900  |
| 19 | C | 8.45386200   | 1.50347300  | 0.68165400  |
| 20 | H | 5.26502200   | -2.16071300 | -0.86294300 |
| 21 | H | 2.83963700   | -2.26814400 | -1.06324300 |
| 22 | H | 4.95130100   | 1.76052100  | 0.87672600  |
| 23 | H | 2.51037300   | 1.66017500  | 0.65859500  |
| 24 | H | 9.01218100   | -0.96967500 | -0.92722500 |
| 25 | H | 10.30161600  | -2.96791400 | -0.25288100 |
| 26 | H | 9.46497200   | -4.44594800 | 1.56845300  |
| 27 | H | 7.32637000   | -3.88558100 | 2.71507600  |
| 28 | H | 6.05191700   | -1.87081500 | 2.05944900  |
| 29 | H | 6.19723800   | 1.56181600  | -1.86847200 |
| 30 | H | 7.37726000   | 3.68255600  | -2.33796100 |
| 31 | H | 9.26452200   | 4.41655800  | -0.88811600 |
| 32 | H | 9.94361700   | 3.00338200  | 1.04672100  |
| 33 | H | 8.74462700   | 0.89712000  | 1.53267300  |
| 34 | C | 0.98726600   | -0.42481900 | -0.28710700 |
| 35 | C | 0.36089900   | -1.69566200 | -0.29122600 |
| 36 | C | 0.11629400   | 0.71046000  | -0.37430700 |
| 37 | C | -1.01379900  | -1.86580400 | -0.39412400 |
| 38 | C | -1.33203400  | 0.52970500  | -0.49237200 |
| 39 | C | -1.90428600  | -0.77847700 | -0.50972800 |
| 40 | N | 0.50597200   | 1.99934500  | -0.39102600 |
| 41 | N | -2.02487800  | 1.68174100  | -0.60358100 |
| 42 | S | -0.89303900  | 2.92930300  | -0.54483900 |
| 43 | H | -1.41564400  | -2.87262500 | -0.34332400 |
| 44 | H | 0.97387800   | -2.58061200 | -0.15921600 |
| 45 | C | -3.35865600  | -1.01372400 | -0.65277400 |
| 46 | C | -4.28549400  | -0.10810200 | -0.12957800 |
| 47 | C | -3.85921300  | -2.17745300 | -1.27898500 |
| 48 | C | -5.68195200  | -0.30595600 | -0.21796400 |
| 49 | H | -3.89243100  | 0.76538300  | 0.36198400  |
| 50 | C | -5.22322500  | -2.40813800 | -1.35474000 |
| 51 | H | -3.17615800  | -2.89537600 | -1.71806800 |
| 52 | C | -6.14479400  | -1.48931900 | -0.84152000 |
| 53 | H | -5.59124600  | -3.30591000 | -1.84230300 |
| 54 | C | -7.91489700  | 0.42497700  | 0.54458500  |
| 55 | C | -8.60587100  | -0.68253200 | -0.01791800 |
| 56 | C | -8.66457600  | 1.30980900  | 1.35679000  |
| 57 | C | -9.97175400  | -0.87385300 | 0.23291500  |
| 58 | H | -8.18663800  | 2.15499600  | 1.82872300  |
| 59 | C | -10.01552100 | 1.10932500  | 1.58993400  |
| 60 | C | -10.68142400 | 0.01344800  | 1.02766000  |

|    |   |              |             |             |
|----|---|--------------|-------------|-------------|
| 61 | H | -10.46958000 | -1.73085800 | -0.20940400 |
| 62 | H | -10.55047100 | 1.80873800  | 2.22309400  |
| 63 | H | -11.73761500 | -0.14716600 | 1.21311000  |
| 64 | N | -6.55370100  | 0.65742500  | 0.31113700  |
| 65 | S | -7.85284300  | -1.81005100 | -1.13115700 |
| 66 | C | -5.99554100  | 1.98147700  | 0.68437800  |
| 67 | H | -5.19240500  | 2.20289000  | -0.01730900 |
| 68 | H | -6.77386600  | 2.72073300  | 0.49504200  |
| 69 | C | -5.49121400  | 2.07302100  | 2.12873200  |
| 70 | H | -5.11139400  | 3.08298600  | 2.30663000  |
| 71 | H | -6.28325900  | 1.87270700  | 2.85396600  |
| 72 | H | -4.68006000  | 1.36663500  | 2.31750700  |

The cartesian coordinates of optimized ground state ( $S_0$ ) geometry in Acetonitrile

| No. | Symbols | X           | Y           | Z           |
|-----|---------|-------------|-------------|-------------|
| 1   | N       | 6.68361000  | -0.14074900 | 0.21035100  |
| 2   | C       | 5.28230700  | -0.21079600 | 0.07211900  |
| 3   | C       | 4.66914800  | -1.33794200 | -0.51317600 |
| 4   | C       | 4.45835600  | 0.84633500  | 0.51034700  |
| 5   | C       | 3.28330300  | -1.40358500 | -0.64031900 |
| 6   | C       | 3.07370000  | 0.77989000  | 0.36316400  |
| 7   | C       | 2.45179100  | -0.35001100 | -0.20681100 |
| 8   | C       | 7.43875000  | -1.31260300 | 0.48167500  |
| 9   | C       | 8.66006300  | -1.53757700 | -0.18067000 |
| 10  | C       | 9.41105700  | -2.68352900 | 0.09843600  |
| 11  | C       | 8.95136700  | -3.62835800 | 1.02523900  |
| 12  | C       | 7.73205900  | -3.40887600 | 1.67973100  |
| 13  | C       | 6.98273200  | -2.25711900 | 1.42051600  |
| 14  | C       | 7.35769100  | 1.10259400  | 0.07626100  |
| 15  | C       | 7.01045700  | 1.99786900  | -0.95264600 |
| 16  | C       | 7.67940700  | 3.21947300  | -1.07654000 |
| 17  | C       | 8.71271200  | 3.55894200  | -0.19311900 |
| 18  | C       | 9.06549800  | 2.66373100  | 0.82530400  |
| 19  | C       | 8.39023400  | 1.44774900  | 0.96796600  |
| 20  | H       | 5.28376300  | -2.15688100 | -0.87687600 |
| 21  | H       | 2.84214500  | -2.27460200 | -1.12037900 |
| 22  | H       | 4.90821900  | 1.72075600  | 0.97278100  |
| 23  | H       | 2.46550800  | 1.60740200  | 0.71542600  |
| 24  | H       | 9.01517300  | -0.81100400 | -0.90740800 |
| 25  | H       | 10.35344800 | -2.84191900 | -0.42190400 |
| 26  | H       | 9.53474000  | -4.52177000 | 1.23512900  |
| 27  | H       | 7.36507400  | -4.12929800 | 2.40793600  |
| 28  | H       | 6.04303900  | -2.08471000 | 1.93964000  |
| 29  | H       | 6.21728800  | 1.73247100  | -1.64743100 |
| 30  | H       | 7.39874900  | 3.90074000  | -1.87720600 |
| 31  | H       | 9.23565900  | 4.50666000  | -0.29756000 |

|    |   |              |             |             |
|----|---|--------------|-------------|-------------|
| 32 | H | 9.86223600   | 2.91521200  | 1.52237000  |
| 33 | H | 8.66000800   | 0.75891700  | 1.76482600  |
| 34 | C | 0.97702400   | -0.46579400 | -0.32478000 |
| 35 | C | 0.32400100   | -1.67530900 | -0.18191000 |
| 36 | C | 0.12317900   | 0.66635400  | -0.61012300 |
| 37 | C | -1.09402300  | -1.82575600 | -0.29859500 |
| 38 | C | -1.32443600  | 0.51375900  | -0.72417300 |
| 39 | C | -1.95332000  | -0.77710900 | -0.56105700 |
| 40 | N | 0.52302600   | 1.92038300  | -0.82941000 |
| 41 | N | -1.93751800  | 1.66163000  | -1.02030500 |
| 42 | S | -0.79657700  | 2.80425200  | -1.13784700 |
| 43 | H | -1.50946400  | -2.81825300 | -0.13898300 |
| 44 | H | 0.90457400   | -2.56177300 | 0.06300400  |
| 45 | C | -3.42192900  | -0.98002400 | -0.68471100 |
| 46 | C | -4.32478100  | -0.01936100 | -0.18956500 |
| 47 | C | -3.92058500  | -2.15896100 | -1.26325700 |
| 48 | C | -5.72047300  | -0.18996000 | -0.28011100 |
| 49 | H | -3.91410800  | 0.87074500  | 0.26488400  |
| 50 | C | -5.30047200  | -2.34639300 | -1.36138200 |
| 51 | H | -3.24272600  | -2.90713100 | -1.66538800 |
| 52 | C | -6.19009400  | -1.36962900 | -0.90566400 |
| 53 | H | -5.69741500  | -3.24408800 | -1.83078100 |
| 54 | C | -7.90482100  | 0.44014200  | 0.66586800  |
| 55 | C | -8.60065600  | -0.67232900 | 0.13467000  |
| 56 | C | -8.57392600  | 1.19863300  | 1.65168700  |
| 57 | C | -9.86566200  | -1.03800200 | 0.60521800  |
| 58 | H | -8.10546500  | 2.07131100  | 2.08839800  |
| 59 | C | -9.85820300  | 0.85316200  | 2.08963900  |
| 60 | C | -10.50998300 | -0.27309600 | 1.58381300  |
| 61 | H | -10.35229100 | -1.91261200 | 0.17815700  |
| 62 | H | -10.33676900 | 1.47287600  | 2.84462400  |
| 63 | H | -11.50084000 | -0.55151600 | 1.93309200  |
| 64 | N | -6.61434600  | 0.78342300  | 0.21089700  |
| 65 | S | -7.93246800  | -1.55817200 | -1.27609200 |
| 66 | C | -6.07397200  | 2.09455000  | 0.58638000  |
| 67 | H | -5.33411900  | 2.37112500  | -0.17222300 |
| 68 | H | -6.89085600  | 2.81861300  | 0.49655100  |
| 69 | C | -5.44376600  | 2.18796300  | 1.99426400  |
| 70 | H | -5.08724900  | 3.21172800  | 2.16034300  |
| 71 | H | -6.16518800  | 1.94515200  | 2.78063000  |
| 72 | H | -4.59421400  | 1.50758300  | 2.10852100  |

The cartesian coordinates of optimized the first singlet excited state ( $S_1$ ) geometry in Acetonitrile

| No. | Symbols | X          | Y           | Z           |
|-----|---------|------------|-------------|-------------|
| 1   | N       | 6.70462600 | -0.10493400 | 0.08514900  |
| 2   | C       | 5.31950500 | -0.18046500 | 0.02725700  |
| 3   | C       | 4.66761700 | -1.38095800 | -0.36799100 |



|    |   |             |             |             |
|----|---|-------------|-------------|-------------|
| 4  | C | 4.50692300  | 0.93751800  | 0.35519900  |
| 5  | C | 3.28939100  | -1.45268200 | -0.41837700 |
| 6  | C | 3.12713900  | 0.86058400  | 0.29226400  |
| 7  | C | 2.45161800  | -0.34000800 | -0.08833800 |
| 8  | C | 7.49219200  | -1.26725300 | 0.32041300  |
| 9  | C | 8.63907000  | -1.50273800 | -0.45911000 |
| 10 | C | 9.42357100  | -2.63352600 | -0.21812400 |
| 11 | C | 9.07184900  | -3.53952500 | 0.79190700  |
| 12 | C | 7.92882500  | -3.30262800 | 1.56738300  |
| 13 | C | 7.14210200  | -2.16973400 | 1.34142600  |
| 14 | C | 7.37959500  | 1.13667600  | -0.08506100 |
| 15 | C | 7.02209200  | 2.00356300  | -1.13402000 |
| 16 | C | 7.69921600  | 3.21554800  | -1.29497900 |
| 17 | C | 8.74066100  | 3.56821900  | -0.42595900 |
| 18 | C | 9.10078400  | 2.69828900  | 0.61238300  |
| 19 | C | 8.42451600  | 1.48846200  | 0.78852700  |
| 20 | H | 5.26182000  | -2.24121000 | -0.66189100 |
| 21 | H | 2.84679800  | -2.37722100 | -0.77600900 |
| 22 | H | 4.97647700  | 1.86049100  | 0.68293800  |
| 23 | H | 2.53879400  | 1.72847000  | 0.56407300  |
| 24 | H | 8.90429800  | -0.80228700 | -1.24714100 |
| 25 | H | 10.30656500 | -2.81042100 | -0.82814000 |
| 26 | H | 9.68375600  | -4.41967500 | 0.97461100  |
| 27 | H | 7.65314100  | -3.99333300 | 2.36112300  |
| 28 | H | 6.26401700  | -1.97477400 | 1.95226700  |
| 29 | H | 6.22454500  | 1.72030400  | -1.81652100 |
| 30 | H | 7.41901800  | 3.87825400  | -2.11070900 |
| 31 | H | 9.26784600  | 4.51003600  | -0.55828400 |
| 32 | H | 9.90488100  | 2.96457300  | 1.29474100  |
| 33 | H | 8.69570700  | 0.81533300  | 1.59804600  |
| 34 | C | 1.00488100  | -0.45735200 | -0.13299600 |
| 35 | C | 0.37690800  | -1.74341500 | -0.11705600 |
| 36 | C | 0.10474100  | 0.67284300  | -0.18826200 |
| 37 | C | -0.99104700 | -1.92455000 | -0.17376700 |
| 38 | C | -1.35348000 | 0.47979300  | -0.25517100 |
| 39 | C | -1.92912200 | -0.84748300 | -0.26736000 |
| 40 | N | 0.46561400  | 1.95610600  | -0.22265200 |
| 41 | N | -2.02546400 | 1.63110700  | -0.33171500 |
| 42 | S | -0.91747100 | 2.86551400  | -0.31909100 |
| 43 | H | -1.35963700 | -2.94174700 | -0.09849400 |
| 44 | H | 0.99562000  | -2.62761100 | 0.00025100  |
| 45 | C | -3.36022400 | -1.11533500 | -0.36737300 |
| 46 | C | -4.33347600 | -0.10128600 | -0.16870400 |
| 47 | C | -3.83323500 | -2.42892200 | -0.66074200 |
| 48 | C | -5.71308100 | -0.33749300 | -0.26816200 |
| 49 | H | -3.96956100 | 0.88622000  | 0.06285700  |
| 50 | C | -5.19187400 | -2.68276600 | -0.75317500 |

|    |   |              |             |             |
|----|---|--------------|-------------|-------------|
| 51 | H | -3.14279000  | -3.24349900 | -0.84985100 |
| 52 | C | -6.13850600  | -1.65967100 | -0.57135900 |
| 53 | H | -5.54113600  | -3.68570700 | -0.99011500 |
| 54 | C | -7.97493400  | 0.50013000  | 0.26306500  |
| 55 | C | -8.63494700  | -0.73020600 | 0.02268400  |
| 56 | C | -8.73777900  | 1.52142300  | 0.87642800  |
| 57 | C | -9.96857400  | -0.93277400 | 0.39971900  |
| 58 | H | -8.29149300  | 2.48415200  | 1.09080600  |
| 59 | C | -10.07627000 | 1.32241300  | 1.22567900  |
| 60 | C | -10.70258600 | 0.09324400  | 0.99899300  |
| 61 | H | -10.42896600 | -1.89933200 | 0.20464300  |
| 62 | H | -10.62240700 | 2.14013700  | 1.69015100  |
| 63 | H | -11.73974000 | -0.06758600 | 1.28068700  |
| 64 | N | -6.63559700  | 0.71047800  | -0.10565400 |
| 65 | S | -7.83821000  | -2.04946100 | -0.88363200 |
| 66 | C | -6.12244300  | 2.08582700  | -0.09456100 |
| 67 | H | -5.31279100  | 2.13674900  | -0.82956400 |
| 68 | H | -6.92147100  | 2.73486200  | -0.46640700 |
| 69 | C | -5.62031200  | 2.58801100  | 1.27589000  |
| 70 | H | -5.30127600  | 3.63278400  | 1.18172900  |
| 71 | H | -6.40469500  | 2.53496900  | 2.03799000  |
| 72 | H | -4.76849600  | 2.00028400  | 1.63244900  |

The cartesian coordinates of optimized the first triplet excited state ( $T_1$ ) geometry in Acetonitrile

| No. | Symbols | X          | Y           | Z           |
|-----|---------|------------|-------------|-------------|
| 1   | N       | 6.53965900 | -0.03955800 | -0.30752600 |
| 2   | C       | 5.17746300 | -0.13612100 | -0.00021200 |
| 3   | C       | 4.50972100 | -1.38669100 | -0.02836500 |
| 4   | C       | 4.41907800 | 1.00923400  | 0.35160700  |
| 5   | C       | 3.16872500 | -1.48644100 | 0.29661600  |
| 6   | C       | 3.07522900 | 0.91245500  | 0.67022100  |
| 7   | C       | 2.38439700 | -0.34412800 | 0.66945700  |
| 8   | C       | 7.42348800 | -1.12171400 | -0.03513500 |
| 9   | C       | 8.37531300 | -1.51174900 | -0.99389000 |
| 10  | C       | 9.25610100 | -2.56248600 | -0.71927800 |
| 11  | C       | 9.19048700 | -3.24398600 | 0.50323900  |
| 12  | C       | 8.23894100 | -2.85775200 | 1.45637300  |
| 13  | C       | 7.36505300 | -1.79740100 | 1.19711600  |
| 14  | C       | 7.07602300 | 1.14903900  | -0.87747500 |
| 15  | C       | 6.41883900 | 1.78870000  | -1.94394400 |
| 16  | C       | 6.95581800 | 2.95479600  | -2.49855300 |
| 17  | C       | 8.15798600 | 3.48535000  | -2.01227500 |
| 18  | C       | 8.81754700 | 2.84132900  | -0.95704000 |
| 19  | C       | 8.27984300 | 1.68416900  | -0.38547900 |
| 20  | H       | 5.05717200 | -2.27917700 | -0.31821900 |
| 21  | H       | 2.70706800 | -2.46609000 | 0.22737500  |
| 22  | H       | 4.90485100 | 1.98057600  | 0.38535400  |

|    |   |              |             |             |
|----|---|--------------|-------------|-------------|
| 23 | H | 2.53574100   | 1.80897000  | 0.95206500  |
| 24 | H | 8.42026100   | -0.98805200 | -1.94581200 |
| 25 | H | 9.98785500   | -2.85460500 | -1.46948300 |
| 26 | H | 9.87328300   | -4.06445200 | 0.71114900  |
| 27 | H | 8.18301000   | -3.37269600 | 2.41312200  |
| 28 | H | 6.63566100   | -1.48923100 | 1.94234400  |
| 29 | H | 5.49289200   | 1.36974600  | -2.33075900 |
| 30 | H | 6.43755900   | 3.44021100  | -3.32284000 |
| 31 | H | 8.57610500   | 4.38821600  | -2.45114500 |
| 32 | H | 9.74955200   | 3.24508900  | -0.56716400 |
| 33 | H | 8.78716500   | 1.18914600  | 0.43907300  |
| 34 | C | 0.99629500   | -0.48073300 | 0.99042300  |
| 35 | C | 0.36851600   | -1.85276100 | 1.10254900  |
| 36 | C | 0.07435200   | 0.62008200  | 1.28409800  |
| 37 | C | -0.94849400  | -2.05717600 | 1.05147600  |
| 38 | C | -1.38290700  | 0.39975000  | 1.22681000  |
| 39 | C | -1.92024400  | -0.91508400 | 0.84045000  |
| 40 | N | 0.39594000   | 1.86035600  | 1.57016300  |
| 41 | N | -2.08871200  | 1.47254900  | 1.48466900  |
| 42 | S | -1.02783100  | 2.73979000  | 1.79790100  |
| 43 | H | -1.35099300  | -3.04645800 | 1.24717900  |
| 44 | H | 1.02309100   | -2.69002300 | 1.32946500  |
| 45 | C | -3.22778400  | -1.15559700 | 0.29559800  |
| 46 | C | -4.19725100  | -0.11533600 | 0.16223200  |
| 47 | C | -3.59000200  | -2.46575500 | -0.13642600 |
| 48 | C | -5.46767500  | -0.33601700 | -0.37974000 |
| 49 | H | -3.91597500  | 0.86807000  | 0.50403800  |
| 50 | C | -4.84522800  | -2.69411800 | -0.68298100 |
| 51 | H | -2.89294400  | -3.29287100 | -0.06702200 |
| 52 | C | -5.77510600  | -1.65289300 | -0.82530800 |
| 53 | H | -5.11473800  | -3.69030500 | -1.02696800 |
| 54 | C | -7.78794500  | 0.47763400  | -0.50208700 |
| 55 | C | -8.33507600  | -0.74565900 | -0.95486100 |
| 56 | C | -8.70065400  | 1.45903200  | -0.05605300 |
| 57 | C | -9.71144900  | -0.99096700 | -0.91976300 |
| 58 | H | -8.34305700  | 2.41914300  | 0.29498200  |
| 59 | C | -10.08031700 | 1.22393200  | -0.05797400 |
| 60 | C | -10.59801900 | -0.00352300 | -0.47708300 |
| 61 | H | -10.08363600 | -1.95404600 | -1.26342000 |
| 62 | H | -10.74559200 | 2.01236600  | 0.28656900  |
| 63 | H | -11.66805400 | -0.19342100 | -0.46638400 |
| 64 | N | -6.39780900  | 0.71176600  | -0.51770700 |
| 65 | S | -7.28110600  | -1.98174000 | -1.71879100 |
| 66 | C | -5.92841400  | 2.08839700  | -0.32579800 |
| 67 | H | -4.95348900  | 2.17292000  | -0.81833700 |
| 68 | H | -6.61049100  | 2.73959100  | -0.88192200 |
| 69 | C | -5.81973700  | 2.56740600  | 1.13926900  |

|    |   |             |            |            |
|----|---|-------------|------------|------------|
| 70 | H | -5.58278400 | 3.63821300 | 1.14816300 |
| 71 | H | -6.75784500 | 2.41923700 | 1.68375300 |
| 72 | H | -5.02973100 | 2.04204900 | 1.68502500 |

The cartesian coordinates of optimized the second triplet excited state ( $T_2$ ) geometry in Acetonitrile

| No. | Symbols | X           | Y           | Z           |
|-----|---------|-------------|-------------|-------------|
| 1   | N       | 6.70502400  | -0.13116800 | 0.14480300  |
| 2   | C       | 5.29569200  | -0.19521900 | 0.03309400  |
| 3   | C       | 4.66335000  | -1.33347300 | -0.50198500 |
| 4   | C       | 4.48562400  | 0.87859400  | 0.44639100  |
| 5   | C       | 3.28223400  | -1.39132200 | -0.60640400 |
| 6   | C       | 3.10445500  | 0.81830900  | 0.32661400  |
| 7   | C       | 2.44825100  | -0.32225600 | -0.19509500 |
| 8   | C       | 7.44543100  | -1.28692600 | 0.51607800  |
| 9   | C       | 8.64874600  | -1.60050100 | -0.13813800 |
| 10  | C       | 9.37494000  | -2.72989100 | 0.23421900  |
| 11  | C       | 8.91051500  | -3.56997300 | 1.24981700  |
| 12  | C       | 7.71071500  | -3.26341800 | 1.89732000  |
| 13  | C       | 6.98407400  | -2.12868400 | 1.54224300  |
| 14  | C       | 7.38855100  | 1.08831400  | -0.11537400 |
| 15  | C       | 7.02166700  | 1.89072400  | -1.20897100 |
| 16  | C       | 7.69166900  | 3.08728400  | -1.45574900 |
| 17  | C       | 8.74259000  | 3.49612800  | -0.63040000 |
| 18  | C       | 9.11393800  | 2.69577400  | 0.45330500  |
| 19  | C       | 8.44116100  | 1.50443000  | 0.71715300  |
| 20  | H       | 5.26470700  | -2.16440700 | -0.85499200 |
| 21  | H       | 2.84049700  | -2.27193700 | -1.06026500 |
| 22  | H       | 4.94775200  | 1.76082100  | 0.87677300  |
| 23  | H       | 2.50864600  | 1.66039200  | 0.65301800  |
| 24  | H       | 9.00538200  | -0.96027000 | -0.93773900 |
| 25  | H       | 10.30173700 | -2.96058100 | -0.28263900 |
| 26  | H       | 9.47645100  | -4.45177100 | 1.53316700  |
| 27  | H       | 7.34287200  | -3.90266600 | 2.69440900  |
| 28  | H       | 6.06188800  | -1.88565500 | 2.05885400  |
| 29  | H       | 6.21717600  | 1.56944700  | -1.86158000 |
| 30  | H       | 7.39860600  | 3.69525700  | -2.30649000 |
| 31  | H       | 9.26561000  | 4.42619900  | -0.82928400 |
| 32  | H       | 9.92366500  | 3.00554800  | 1.10728100  |
| 33  | H       | 8.72286700  | 0.89446700  | 1.56866300  |
| 34  | C       | 0.98617900  | -0.42509700 | -0.29549000 |
| 35  | C       | 0.35799900  | -1.69495100 | -0.28600800 |
| 36  | C       | 0.11740700  | 0.71008900  | -0.40044800 |
| 37  | C       | -1.01719200 | -1.86483300 | -0.38734500 |
| 38  | C       | -1.33179300 | 0.52973000  | -0.51671500 |
| 39  | C       | -1.90672300 | -0.77781900 | -0.51501100 |
| 40  | N       | 0.50908700  | 1.99839000  | -0.43831800 |
| 41  | N       | -2.02244500 | 1.68070500  | -0.64810700 |

|    |   |              |             |             |
|----|---|--------------|-------------|-------------|
| 42 | S | -0.88948800  | 2.92831400  | -0.60797400 |
| 43 | H | -1.42021900  | -2.87051600 | -0.32536000 |
| 44 | H | 0.96990800   | -2.57924000 | -0.14426500 |
| 45 | C | -3.36105800  | -1.01206600 | -0.65220000 |
| 46 | C | -4.28649400  | -0.10512800 | -0.12833200 |
| 47 | C | -3.86242500  | -2.17933400 | -1.27229800 |
| 48 | C | -5.68350200  | -0.30500800 | -0.20883600 |
| 49 | H | -3.89319300  | 0.76930200  | 0.36140600  |
| 50 | C | -5.22620900  | -2.41149900 | -1.34215000 |
| 51 | H | -3.18017000  | -2.89860700 | -1.71053300 |
| 52 | C | -6.14716600  | -1.49221300 | -0.82764700 |
| 53 | H | -5.59497300  | -3.31122200 | -1.82531700 |
| 54 | C | -7.91640100  | 0.42633900  | 0.55337200  |
| 55 | C | -8.60774500  | -0.68170900 | -0.00625700 |
| 56 | C | -8.66509600  | 1.31408900  | 1.36294000  |
| 57 | C | -9.97481600  | -0.86997200 | 0.24127600  |
| 58 | H | -8.18718000  | 2.15962000  | 1.83412100  |
| 59 | C | -10.01670400 | 1.11624000  | 1.59442800  |
| 60 | C | -10.68388400 | 0.02074100  | 1.03253300  |
| 61 | H | -10.47361500 | -1.72690800 | -0.19990000 |
| 62 | H | -10.55123500 | 1.81772200  | 2.22551500  |
| 63 | H | -11.74078200 | -0.13711000 | 1.21602000  |
| 64 | N | -6.55383500  | 0.65736300  | 0.31978400  |
| 65 | S | -7.85363500  | -1.82012000 | -1.10720200 |
| 66 | C | -5.99604300  | 1.98210000  | 0.69152000  |
| 67 | H | -5.19534400  | 2.20434900  | -0.01270200 |
| 68 | H | -6.77489100  | 2.72080100  | 0.50393800  |
| 69 | C | -5.48903900  | 2.07332000  | 2.13488700  |
| 70 | H | -5.11028600  | 3.08378800  | 2.31210800  |
| 71 | H | -6.28035500  | 1.87286600  | 2.86066200  |
| 72 | H | -4.67775300  | 1.36668700  | 2.32277900  |
